# Supplementary material for: High performing and sustainable hard carbons for Na-ion batteries through acid-catalysed hydrothermal carbonisation of vine shoots
Source: Royal Society of Chemistry journal article supplement (doi:10.1039/d4ta07393b), 2024-12-03
Supplement: d4ta07393b1.pdf [file d4ta07393b1.pdf]

## Supplementary Information

# High performing and sustainable hard carbons for Na-ion batteries through acid-catalysed hydrothermal carbonisation of vine shoots

Darío Alvira,<sup>\*a,b</sup> Daniel Antorán,<sup>a,b</sup> Hamideh Darjazi,<sup>c,d</sup> Giuseppe Antonio

Elia,<sup>c,d</sup> Claudio Gerbaldi,<sup>c,d</sup> Victor Sebastian<sup>b,e,f,g</sup> and Joan J. Manyà<sup>a,b</sup>

<sup>a</sup> *Aragón Institute for Engineering Research (I3A), Thermochemical Processes Group,  
University of Zaragoza, Escuela Politécnica Superior, Crta. de Cuarte s/n, 22071  
Huesca, Spain.*

<sup>b</sup> *Department of Chemical Engineering and Environmental Technologies, University of  
Zaragoza, Campus Río Ebro, María de Luna 3, 50018 Zaragoza, Spain.*

<sup>c</sup> *GAME Lab - Department of Applied Science and Technology (DISAT), Politecnico di  
Torino, Corso Duca Degli Abruzzi 24, Turin 10129 (Italy)*

<sup>d</sup> *National Reference Centre for Electrochemical Energy Storage (GISEL) - INSTM, Via  
G. Giusti 9, Florence 50121 (Italy)*

<sup>e</sup> *Instituto de Nanociencia y Materiales de Aragón (INMA), CSIC-Universidad de  
Zaragoza, Zaragoza, Spain.*

<sup>f</sup> *Networking Research Center on Bioengineering Biomaterials and Nanomedicine  
(CIBER-BBN), Madrid, Spain.*

<sup>g</sup> *Laboratorio de Microscopías Avanzadas, Universidad de Zaragoza, 50018, Zaragoza,  
Spain.*

\*Corresponding authors. Email addresses: [dalvira@unizar.es](mailto:dalvira@unizar.es) (Darío Alvira) and  
[claudio.gerbaldi@polito.it](mailto:claudio.gerbaldi@polito.it) (Claudio Gerbaldi).

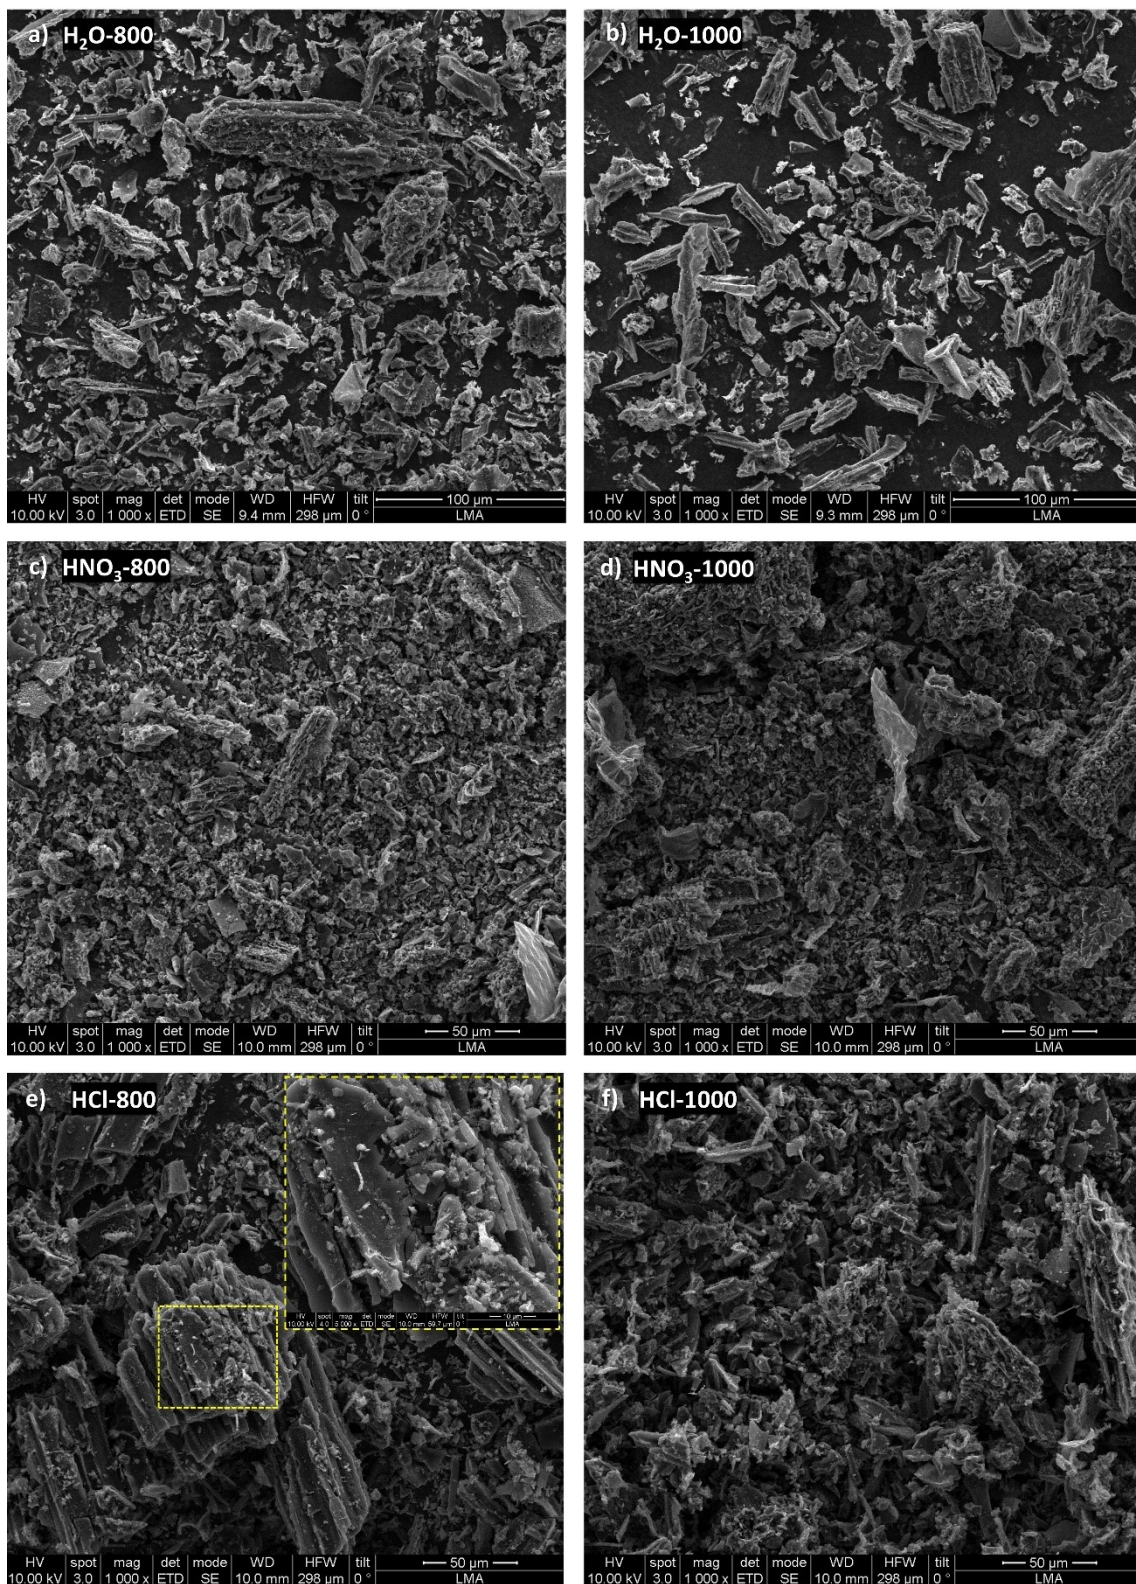

Fig. S1. SEM images of H<sub>2</sub>O-800 (a), H<sub>2</sub>O-1000 (b), HNO<sub>3</sub>-800 (c), HNO<sub>3</sub>-1000 (d), HCl-800 (e), and HCl-1000 (f).

Table S1. Mass yields after HTC and annealing steps. Total yield has been calculated with respect to the dry biomass.

|                                      | HTC (%) | Annealing (%) | Total yield (%) |
|--------------------------------------|---------|---------------|-----------------|
| H <sub>2</sub> O-800                 | 59.84   | 37.12         | 22.21           |
| H <sub>2</sub> O-1000                | 59.12   | 35.89         | 21.22           |
| HNO <sub>3</sub> -800                | 37.93   | 37.58         | 14.26           |
| HNO <sub>3</sub> -1000               | 37.93   | 36.07         | 13.68           |
| HCl-800                              | 38.37   | 50.38         | 19.33           |
| HCl-1000                             | 38.37   | 52.82         | 20.27           |
| H <sub>2</sub> SO <sub>4</sub> -800  | 44.01   | 53.10         | 23.37           |
| H <sub>2</sub> SO <sub>4</sub> -1000 | 44.01   | 50.59         | 22.27           |
| H <sub>3</sub> PO <sub>4</sub> -800  | 48.66   | 55.11         | 26.82           |
| H <sub>3</sub> PO <sub>4</sub> -800  | 48.66   | 53.97         | 26.26           |

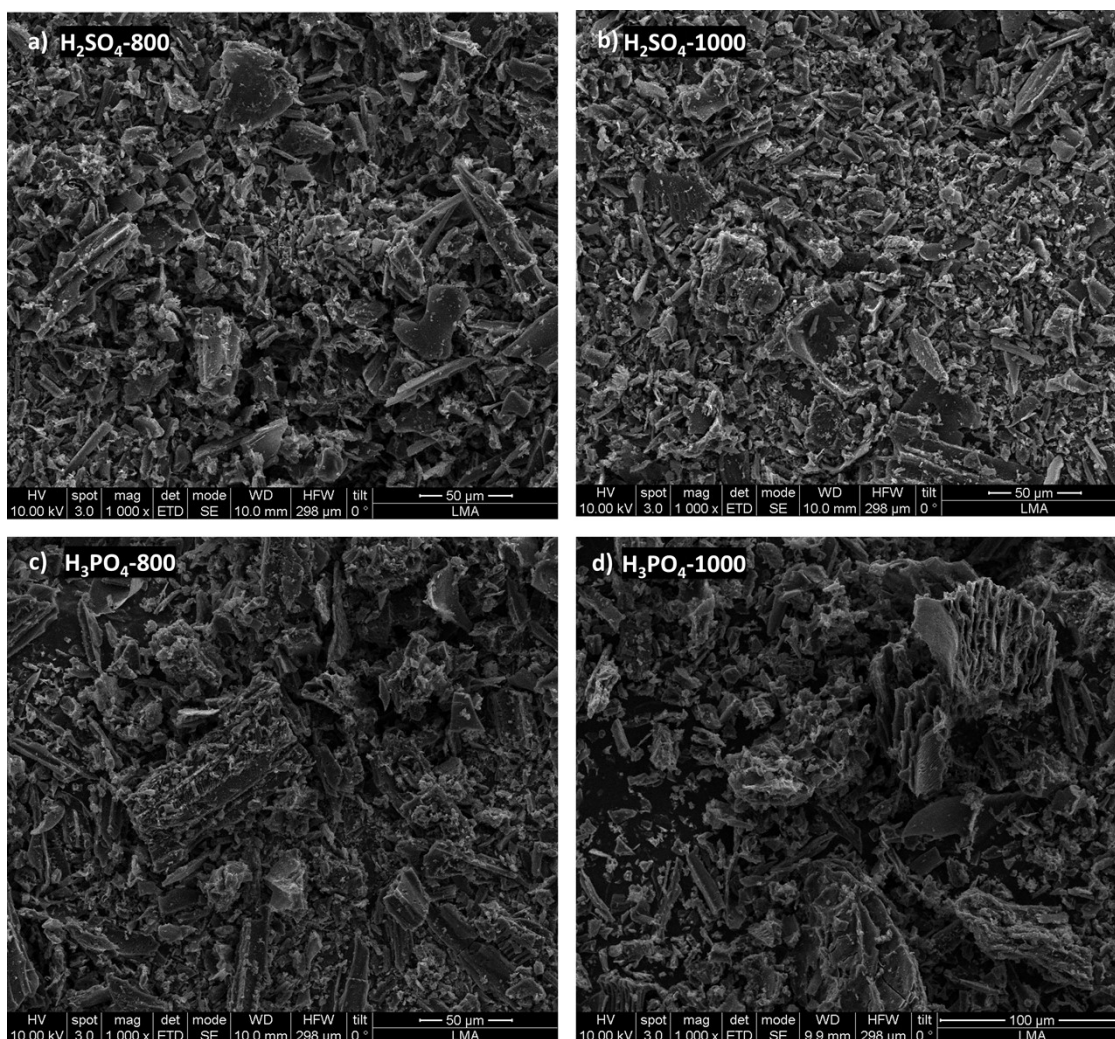

Fig. S2. SEM images of H<sub>2</sub>SO<sub>4</sub>-800 (a), H<sub>2</sub>SO<sub>4</sub>-1000 (b), H<sub>3</sub>PO<sub>4</sub>-800 (c), and H<sub>3</sub>PO<sub>4</sub>-1000 (d).

Table S2. Surface areas and pore volumes of HCs deduced from CO<sub>2</sub> and N<sub>2</sub> adsorption isotherms

|                                      | Surface area BET [m <sup>2</sup> g <sup>-1</sup> ] |                 | Surface area NLDFT [m <sup>2</sup> g <sup>-1</sup> ] |                 | Pore volume NLDFT [cm <sup>3</sup> g <sup>-1</sup> ] |                  |                  |
|--------------------------------------|----------------------------------------------------|-----------------|------------------------------------------------------|-----------------|------------------------------------------------------|------------------|------------------|
|                                      | N <sub>2</sub>                                     | CO <sub>2</sub> | N <sub>2</sub>                                       | CO <sub>2</sub> | $V_{\text{ultra}}$                                   | $V_{\text{mic}}$ | $V_{\text{mes}}$ |
| H <sub>2</sub> O-800                 | 82                                                 | 397             | 59                                                   | 602             | 0.122                                                | 0.080            | 0.025            |
| H <sub>2</sub> O-1000                | 17                                                 | 445             | 15                                                   | 634             | 0.127                                                | 0.062            | 0.030            |
| HNO <sub>3</sub> -800                | 5                                                  | 393             | 7                                                    | 613             | 0.124                                                | 0.040            | 0.018            |
| HNO <sub>3</sub> -1000               | 9                                                  | 284             | 9                                                    | 311             | 0.054                                                | 0.048            | 0.028            |
| HCl-800                              | 659                                                | 575             | 583                                                  | 799             | 0.157                                                | 0.295            | 0.240            |
| HCl-1000                             | 127                                                | 440             | 88                                                   | 637             | 0.127                                                | 0.079            | 0.212            |
| H <sub>2</sub> SO <sub>4</sub> -800  | 297                                                | 428             | 226                                                  | 648             | 0.129                                                | 0.139            | 0.145            |
| H <sub>2</sub> SO <sub>4</sub> -1000 | 31                                                 | 439             | 26                                                   | 643             | 0.129                                                | 0.050            | 0.123            |
| H <sub>3</sub> PO <sub>4</sub> -800  | 346                                                | 452             | 306                                                  | 683             | 0.136                                                | 0.175            | 0.126            |
| H <sub>3</sub> PO <sub>4</sub> -1000 | 42                                                 | 449             | 35                                                   | 664             | 0.135                                                | 0.050            | 0.124            |

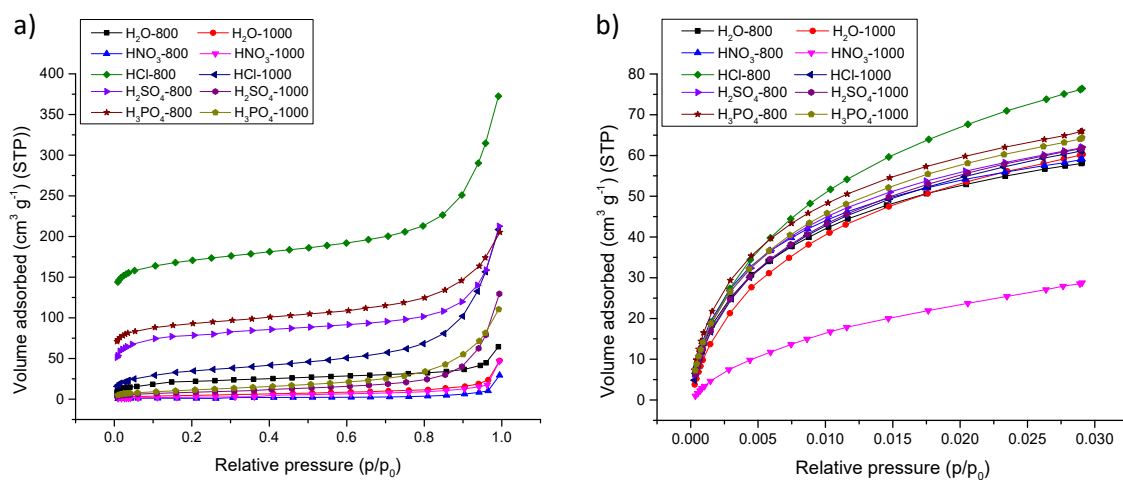

Fig. S3. N<sub>2</sub> adsorption isotherms at -196 °C (a) and CO<sub>2</sub> adsorption isotherms at 0 °C

(b).

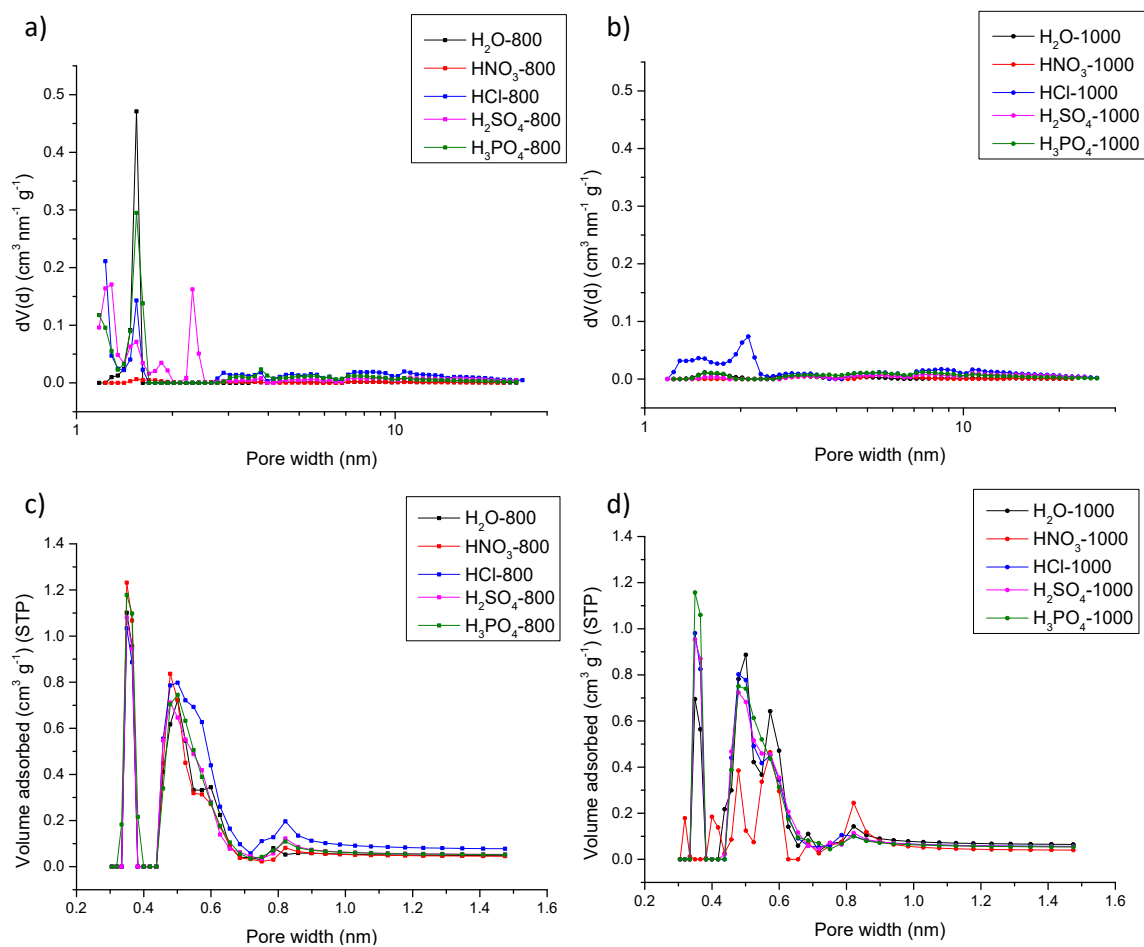

Fig. S4. Pore size distribution diagrams (NLDFT model) for  $N_2$  (a-b) and  $CO_2$  adsorption isotherms (c-d).

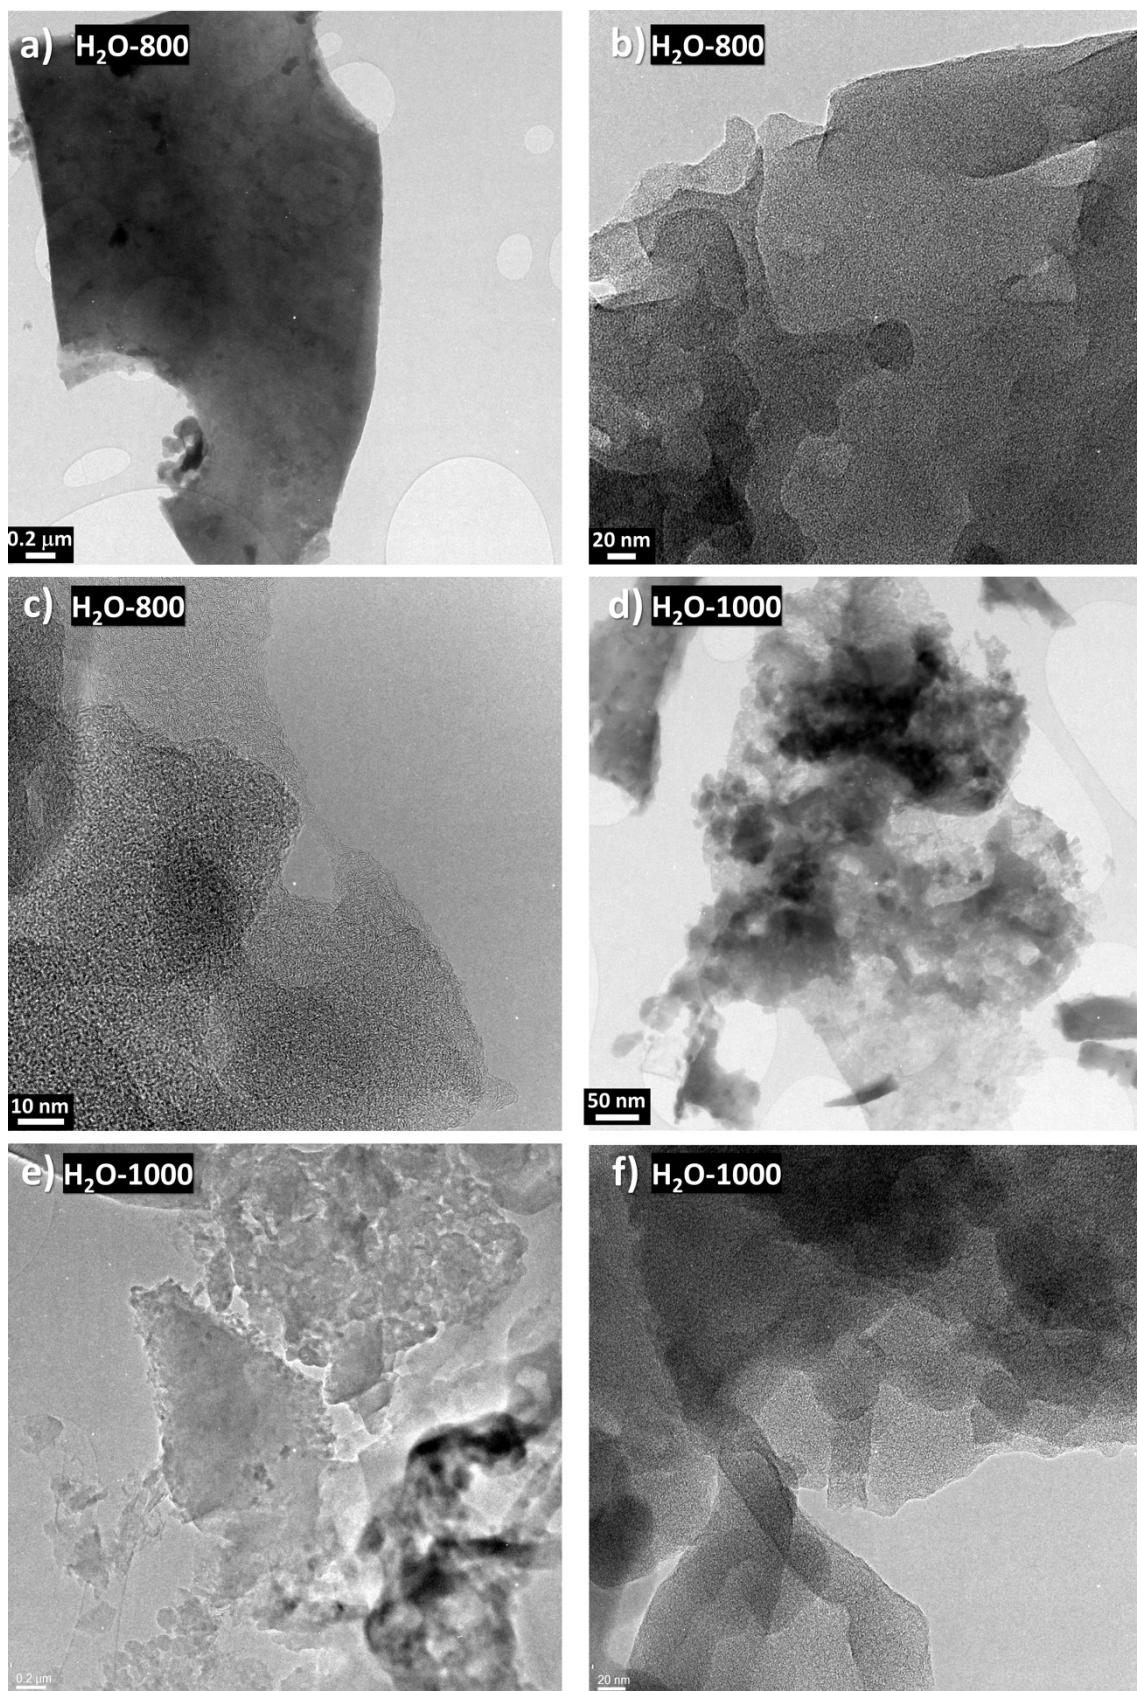

Fig. S5. HR-TEM images of H<sub>2</sub>O-800 (a–c) and H<sub>2</sub>O-1000 (d–f).

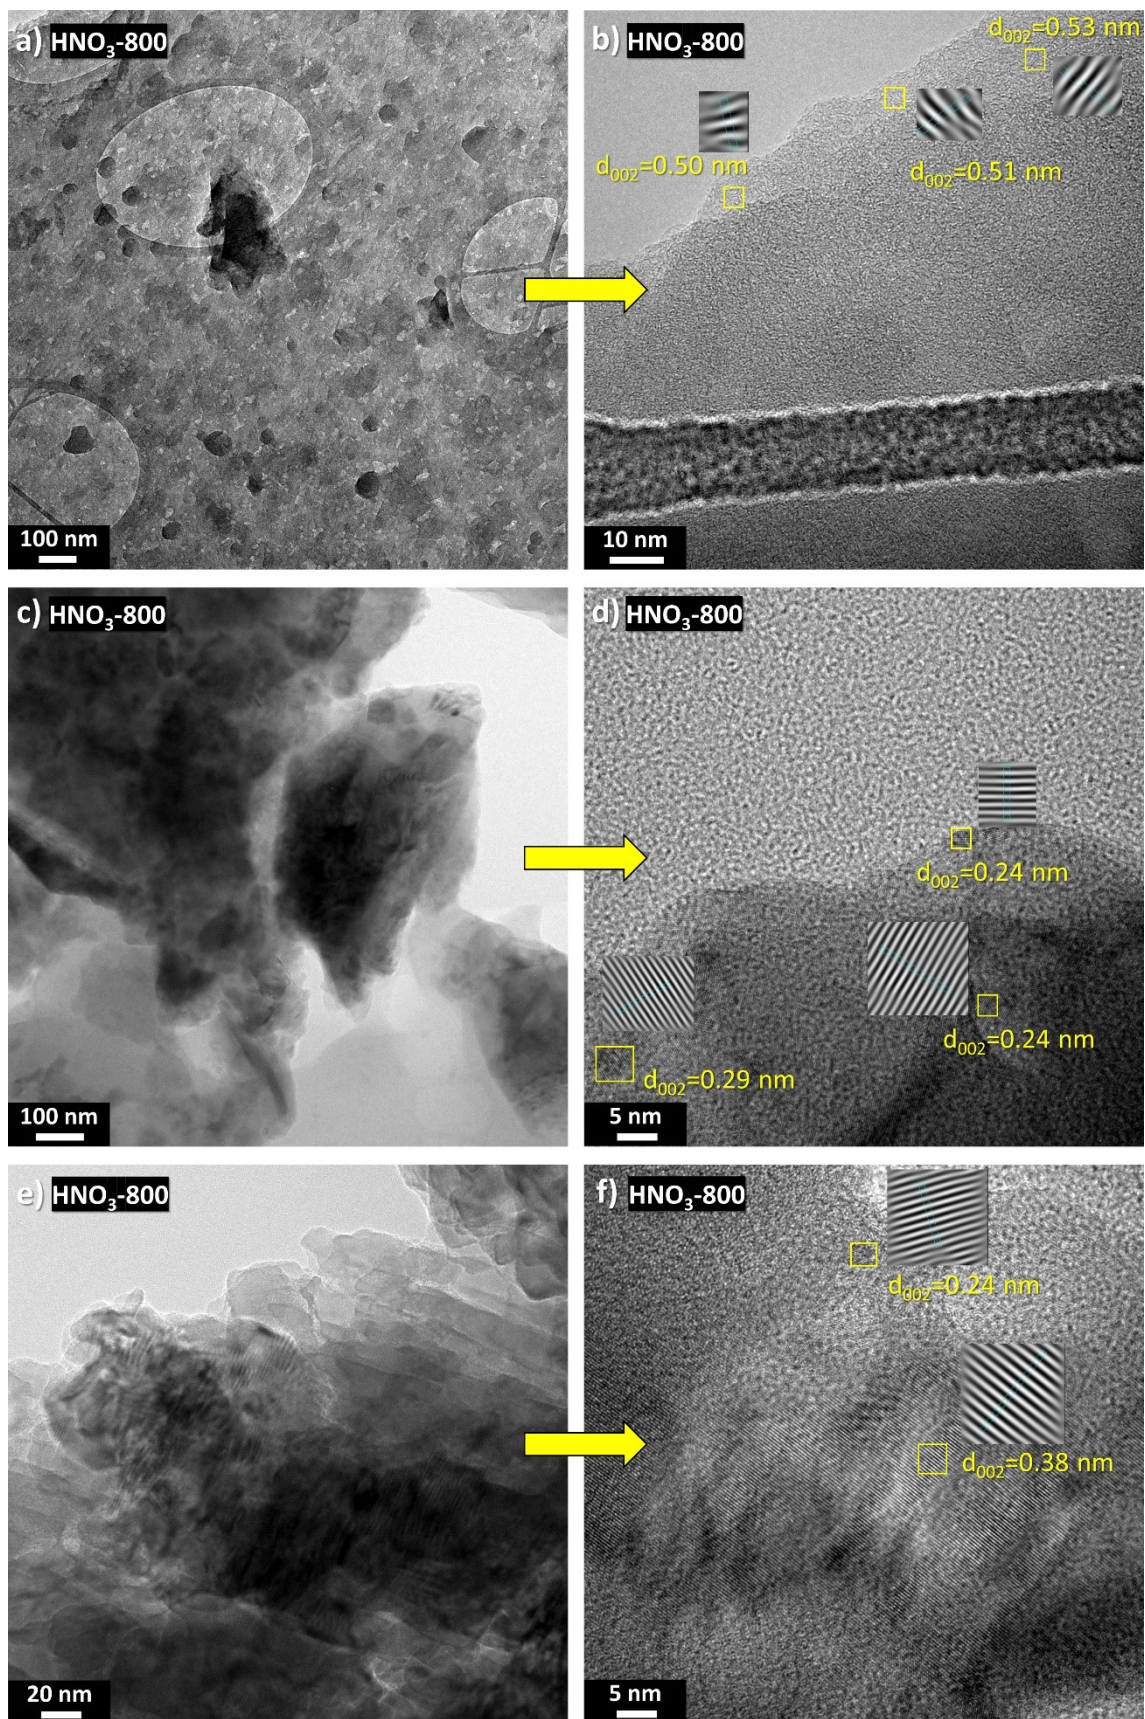

Fig. S6. HR-TEM images of HNO<sub>3</sub>-800.

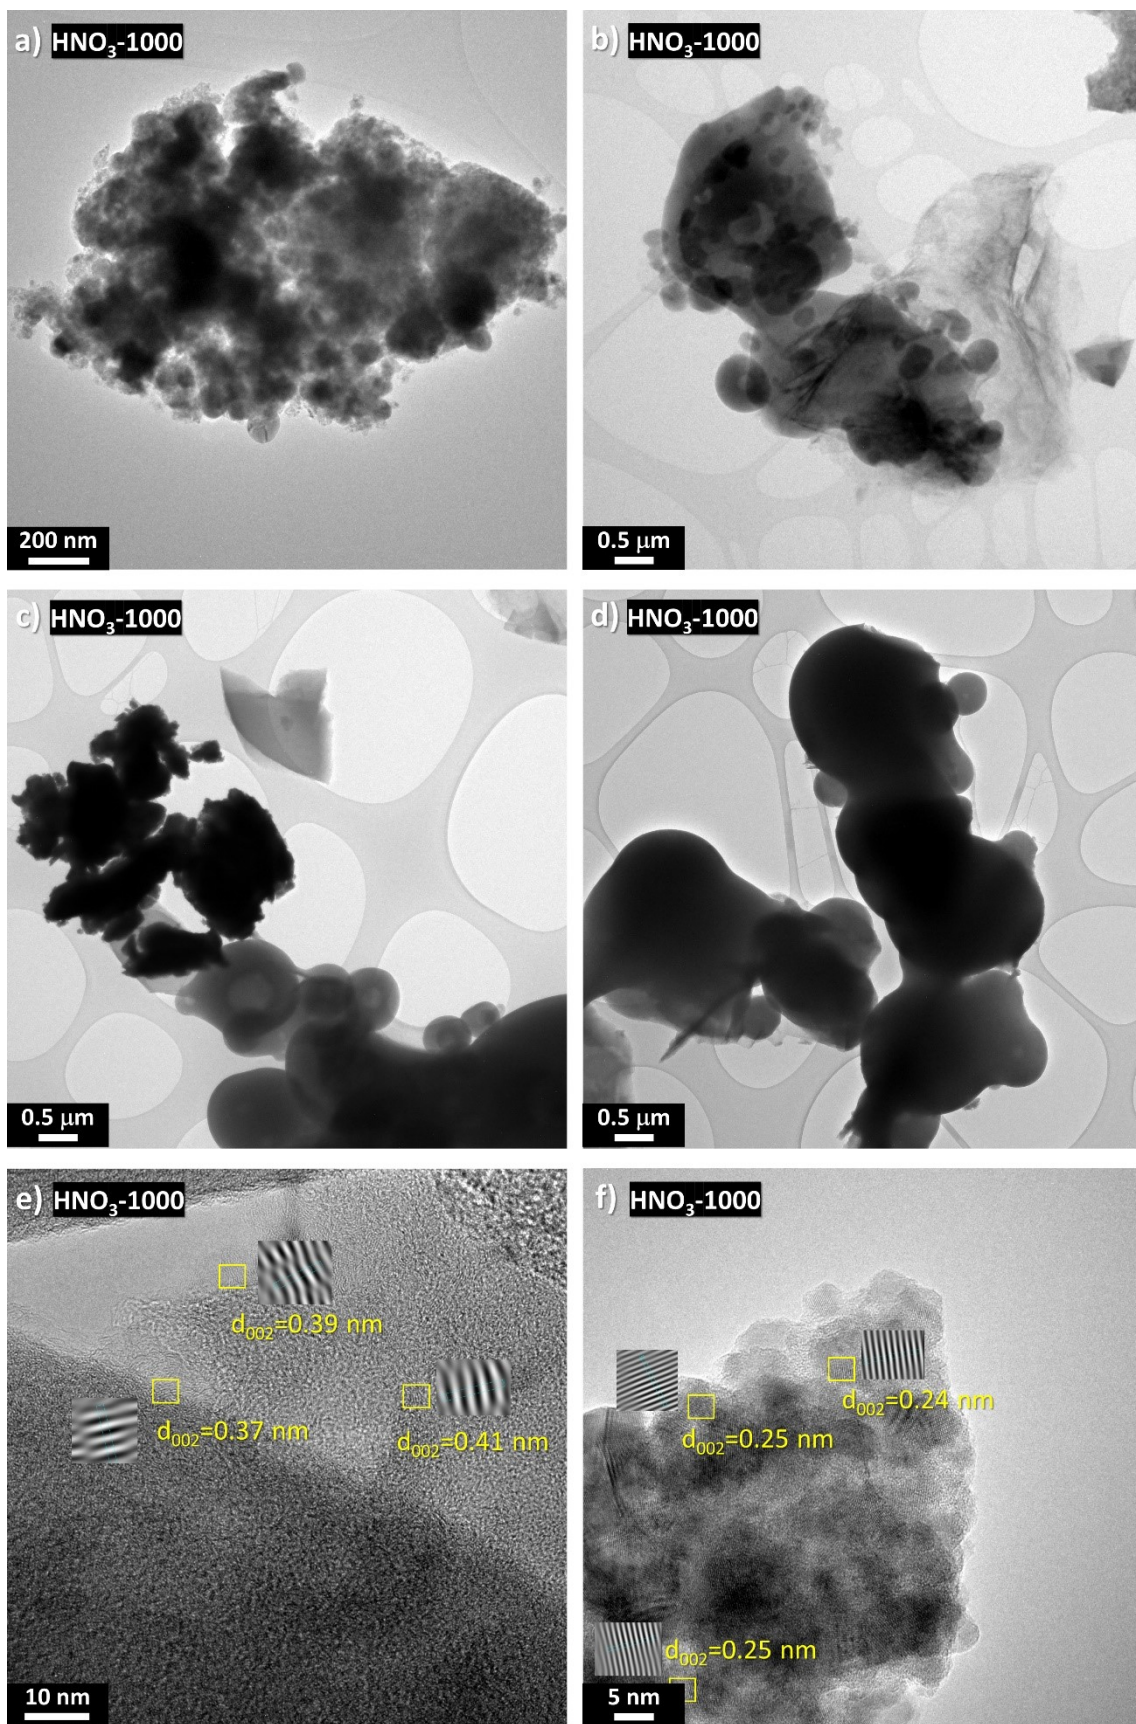

Fig. S7. HR-TEM images of HNO<sub>3</sub>-1000.



S

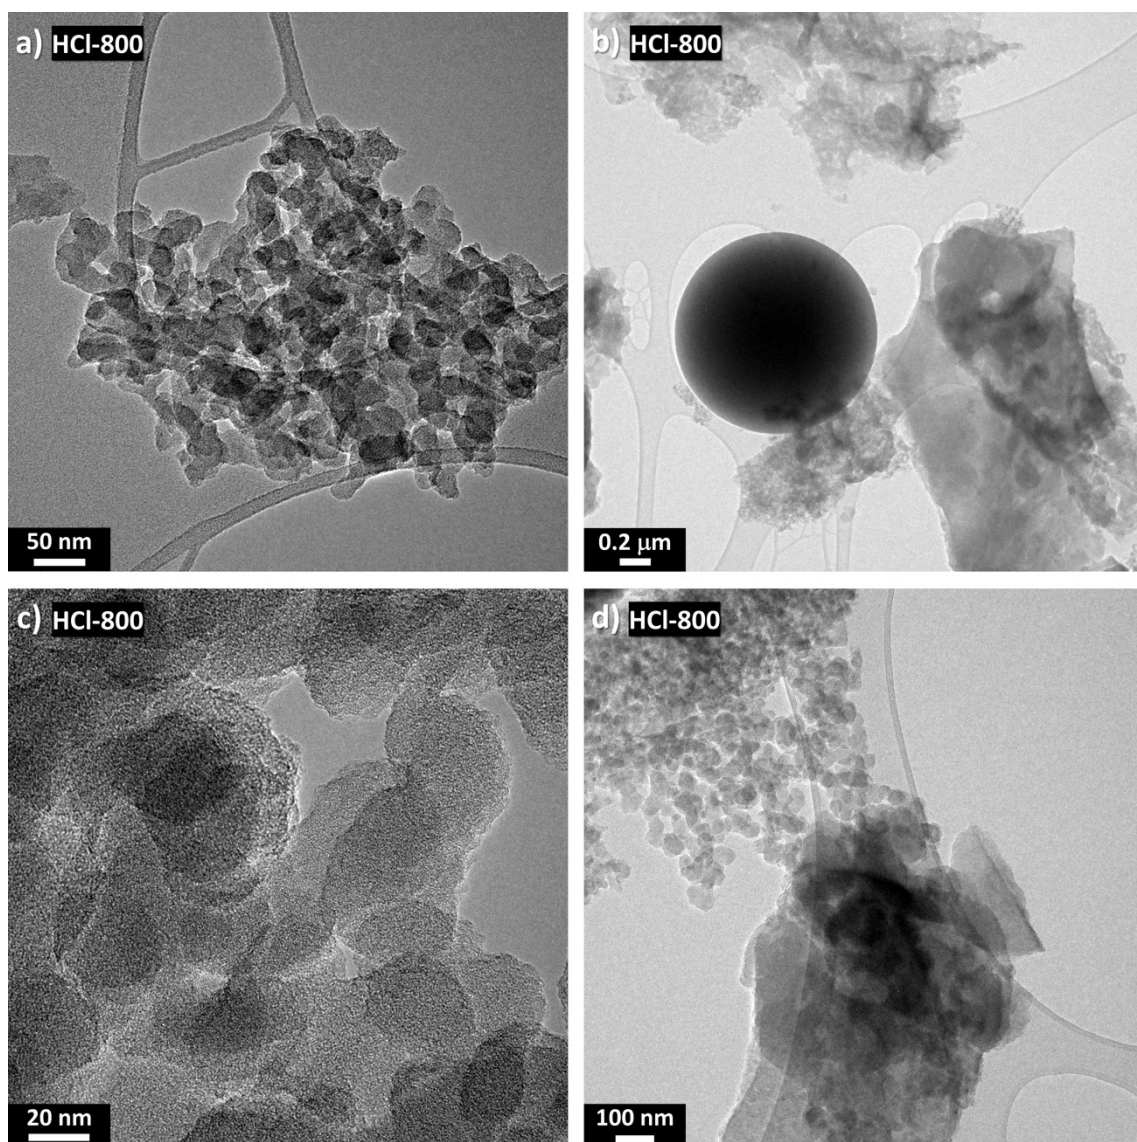

Fig. S8. HR-TEM images of HCl-800.

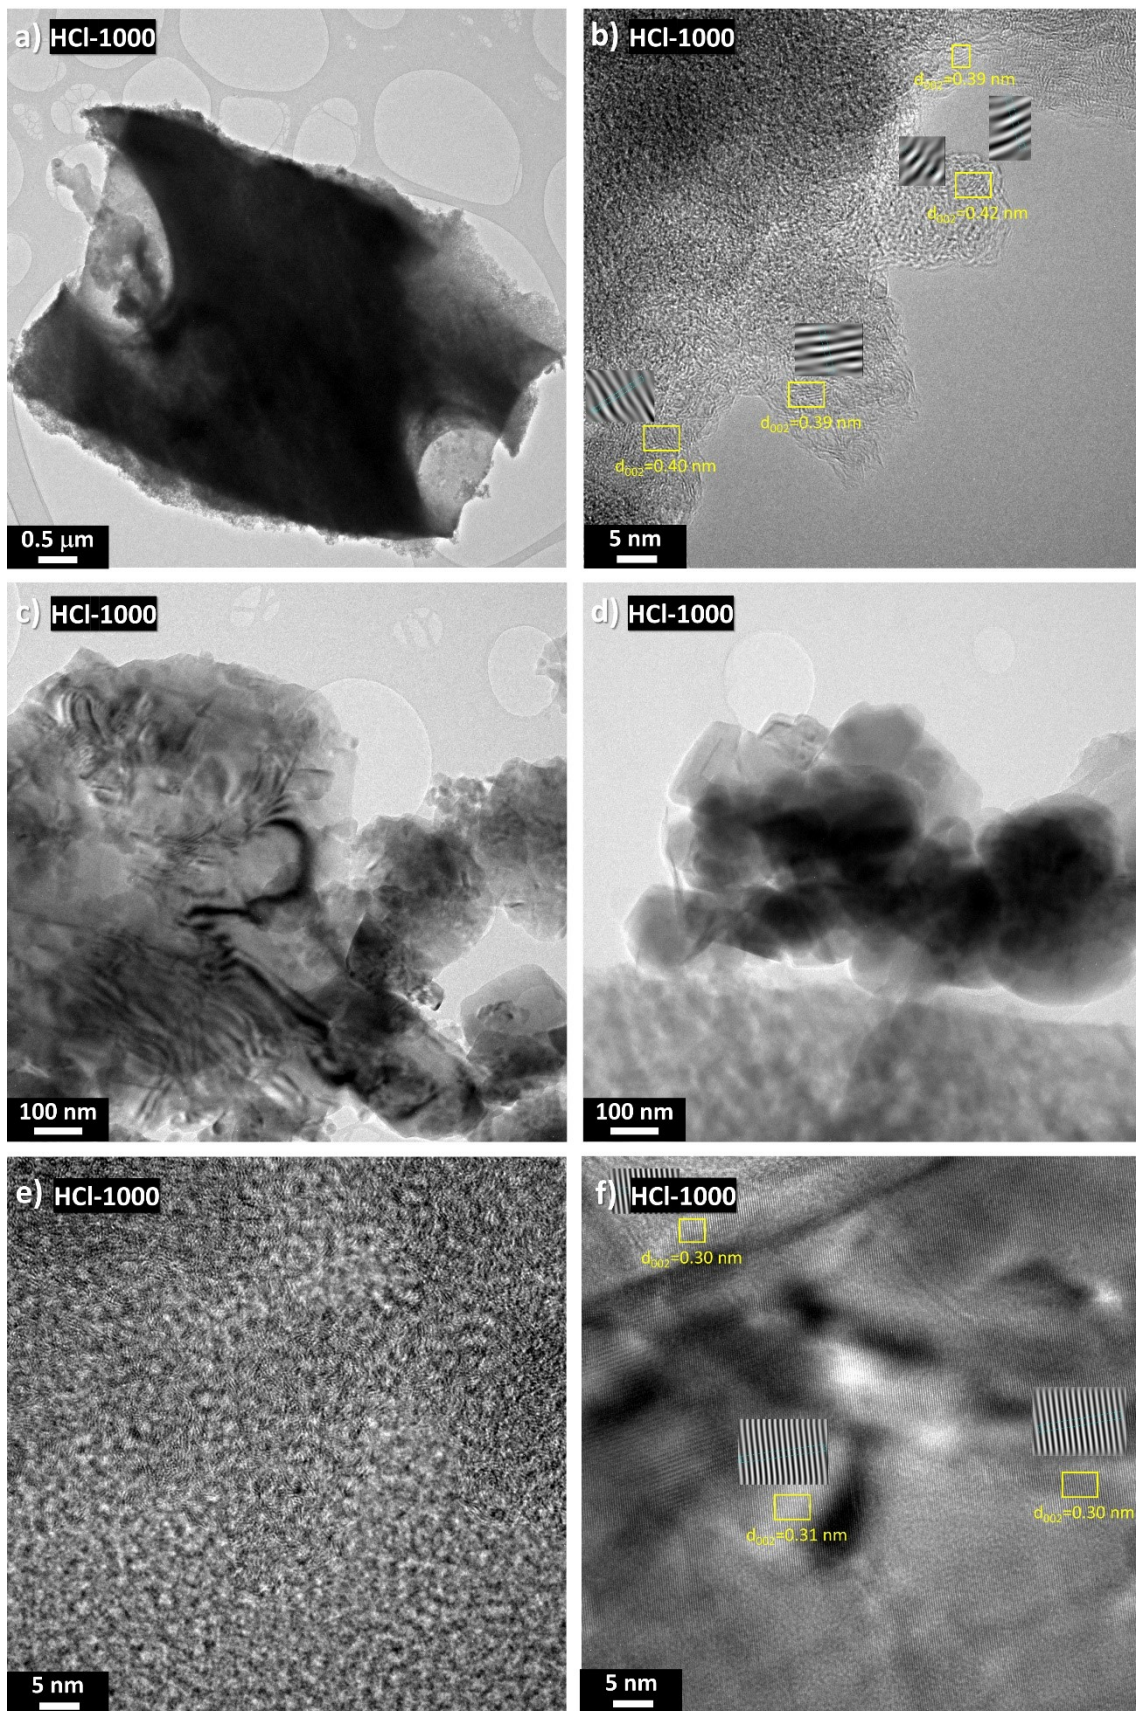

Fig. S9. HR-TEM images of HCl-1000.

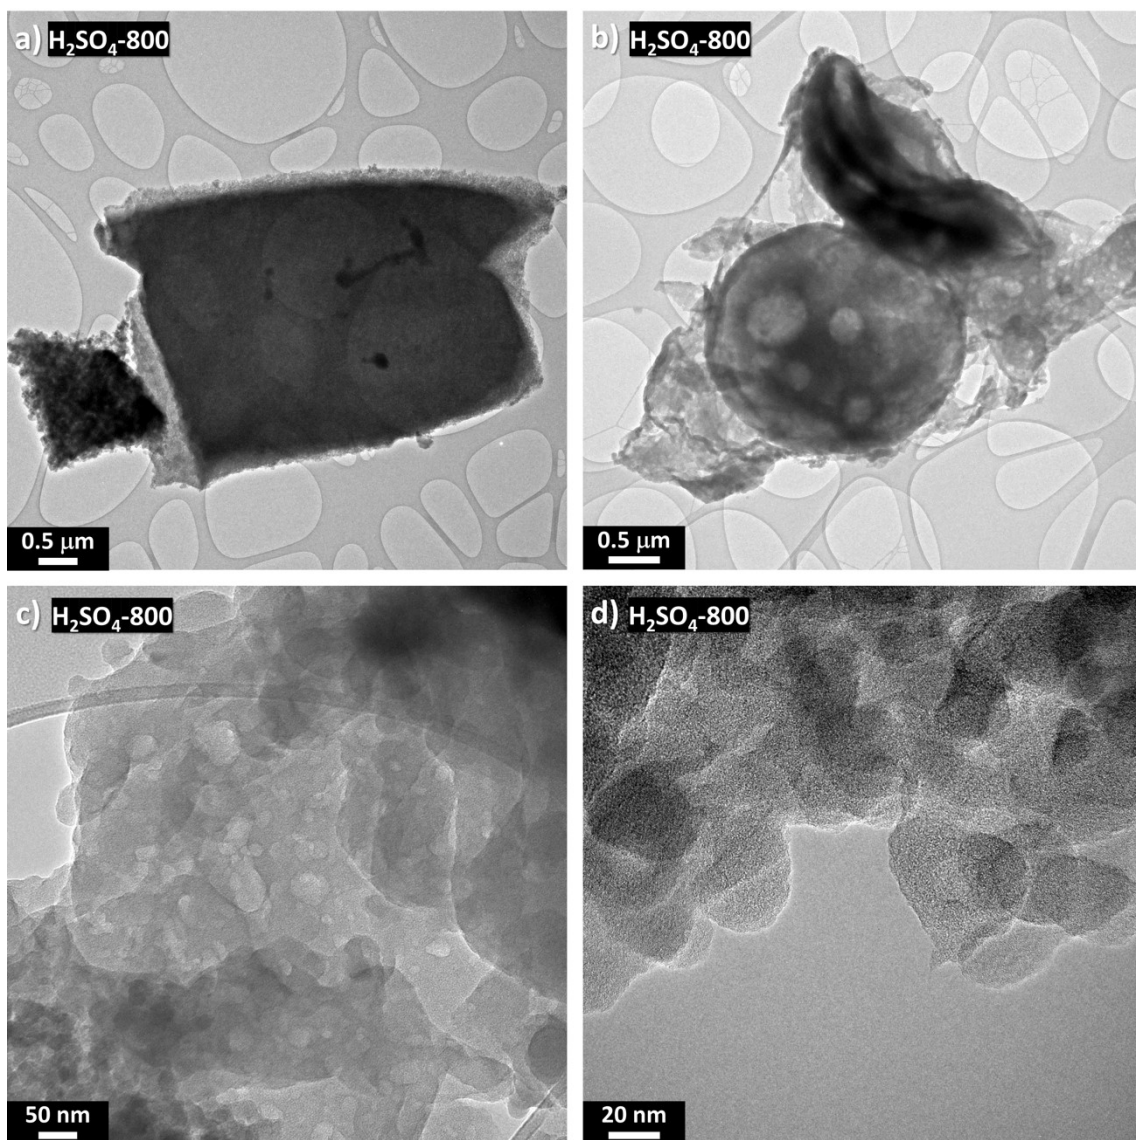

Fig. S10. HR-TEM images of H<sub>2</sub>SO<sub>4</sub>-800.

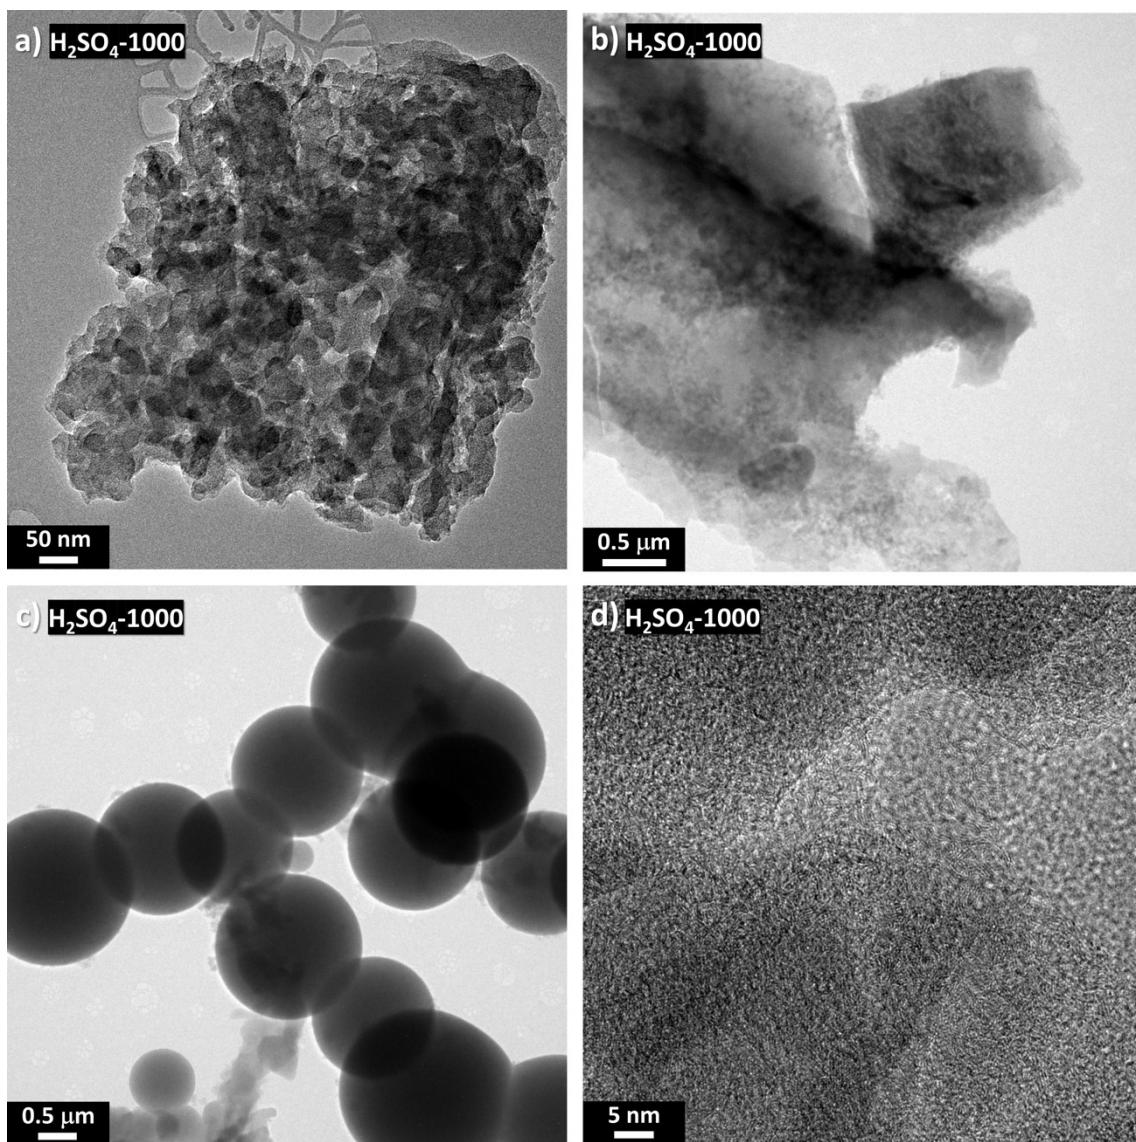

Fig. S11. HR-TEM images of H<sub>2</sub>SO<sub>4</sub>-1000.

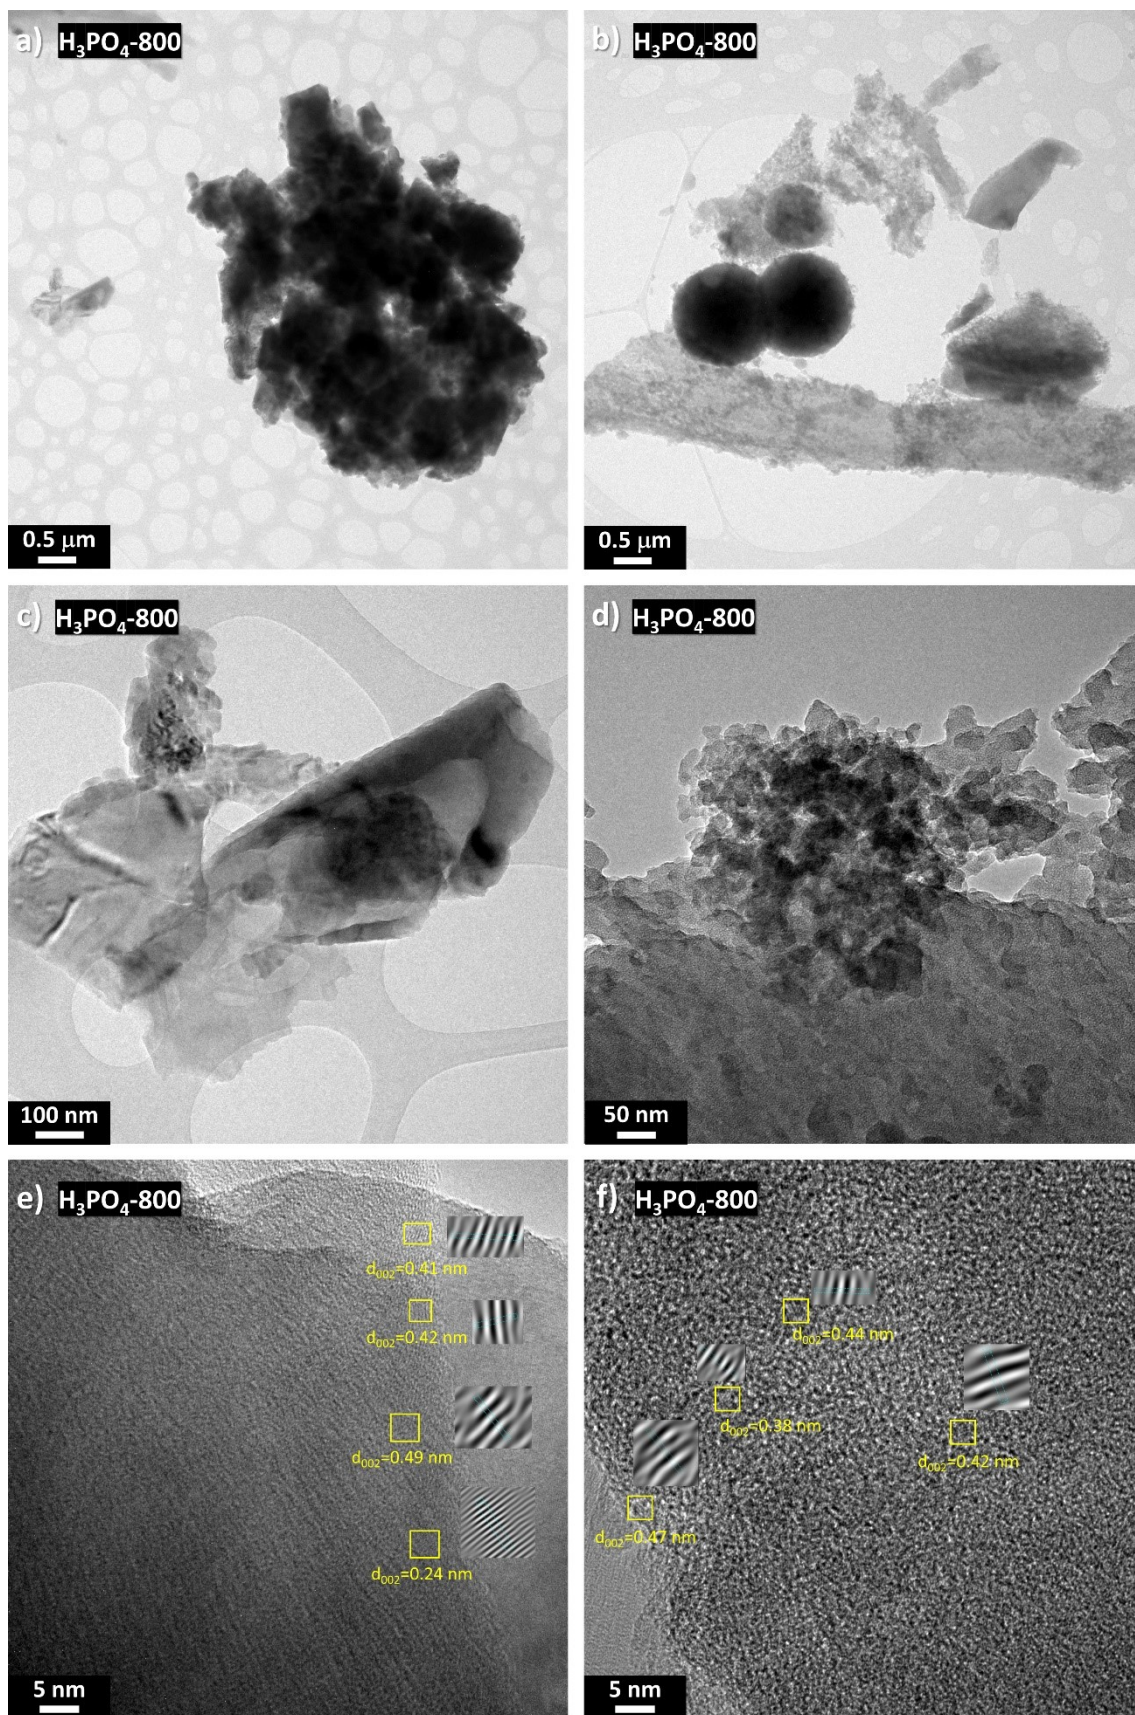

Fig. S12. HR-TEM images of  $\text{H}_3\text{PO}_4\text{-800}$ .

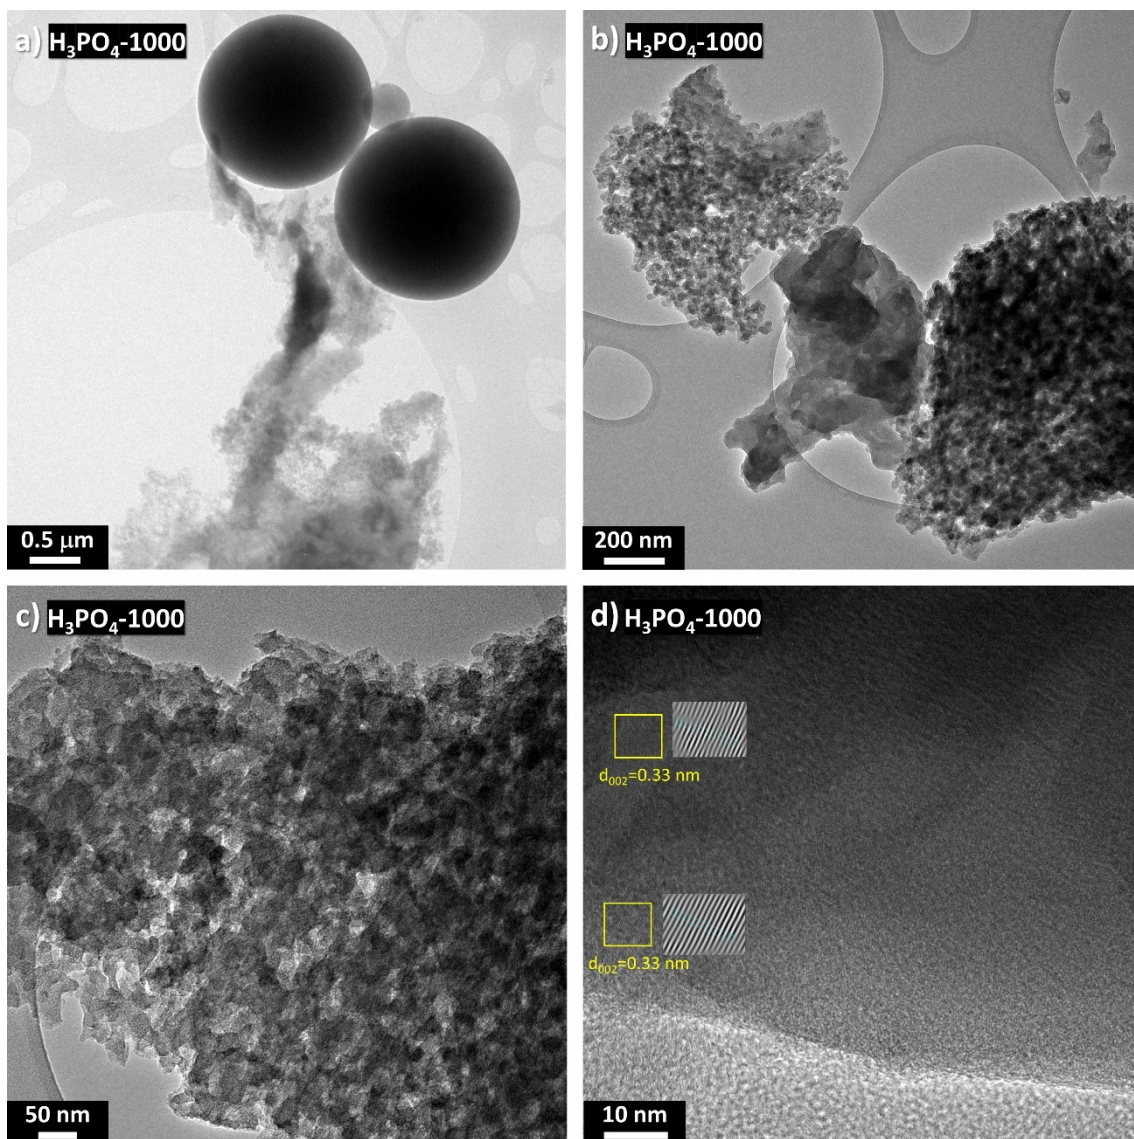

Fig. S13. HR-TEM images of  $\text{H}_3\text{PO}_4\text{-1000}$ .

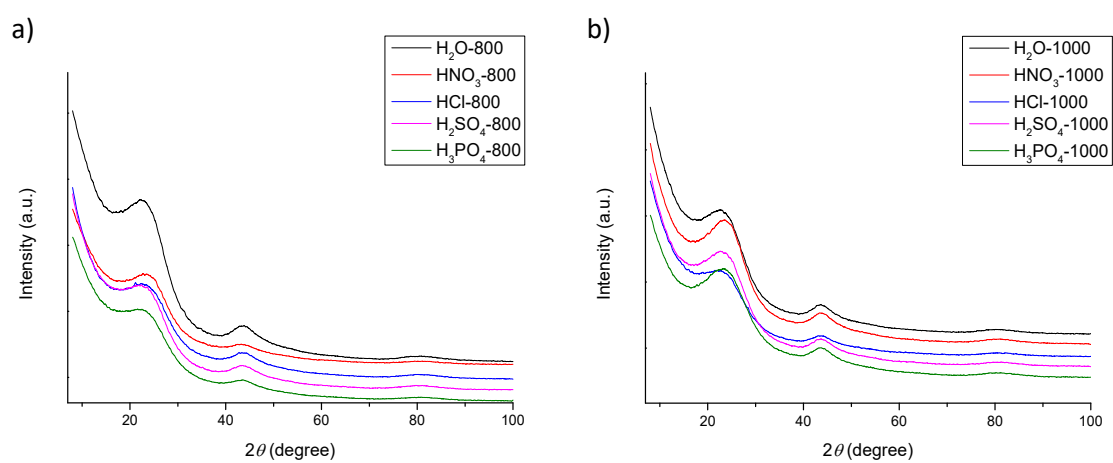

Fig. S14. XRD patterns.

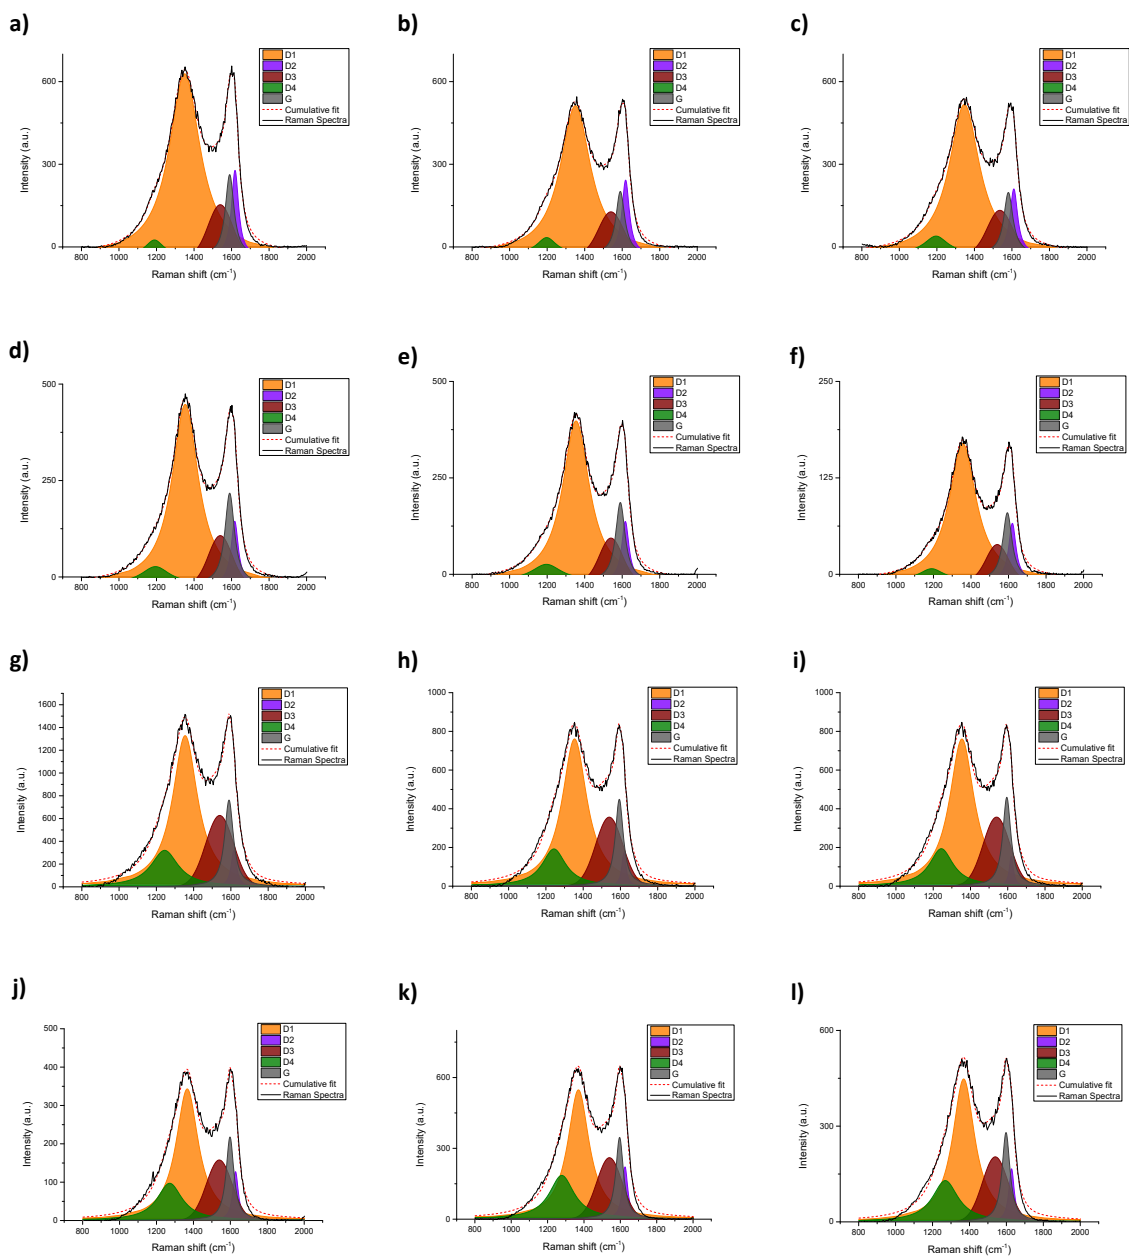

Fig. S15. Raman peaks deconvolution for H<sub>2</sub>O-800 (a–c), H<sub>2</sub>O-1000 (d–f), HNO<sub>3</sub>-800 (g–i), and HNO<sub>3</sub>-1000 (j–l) samples.

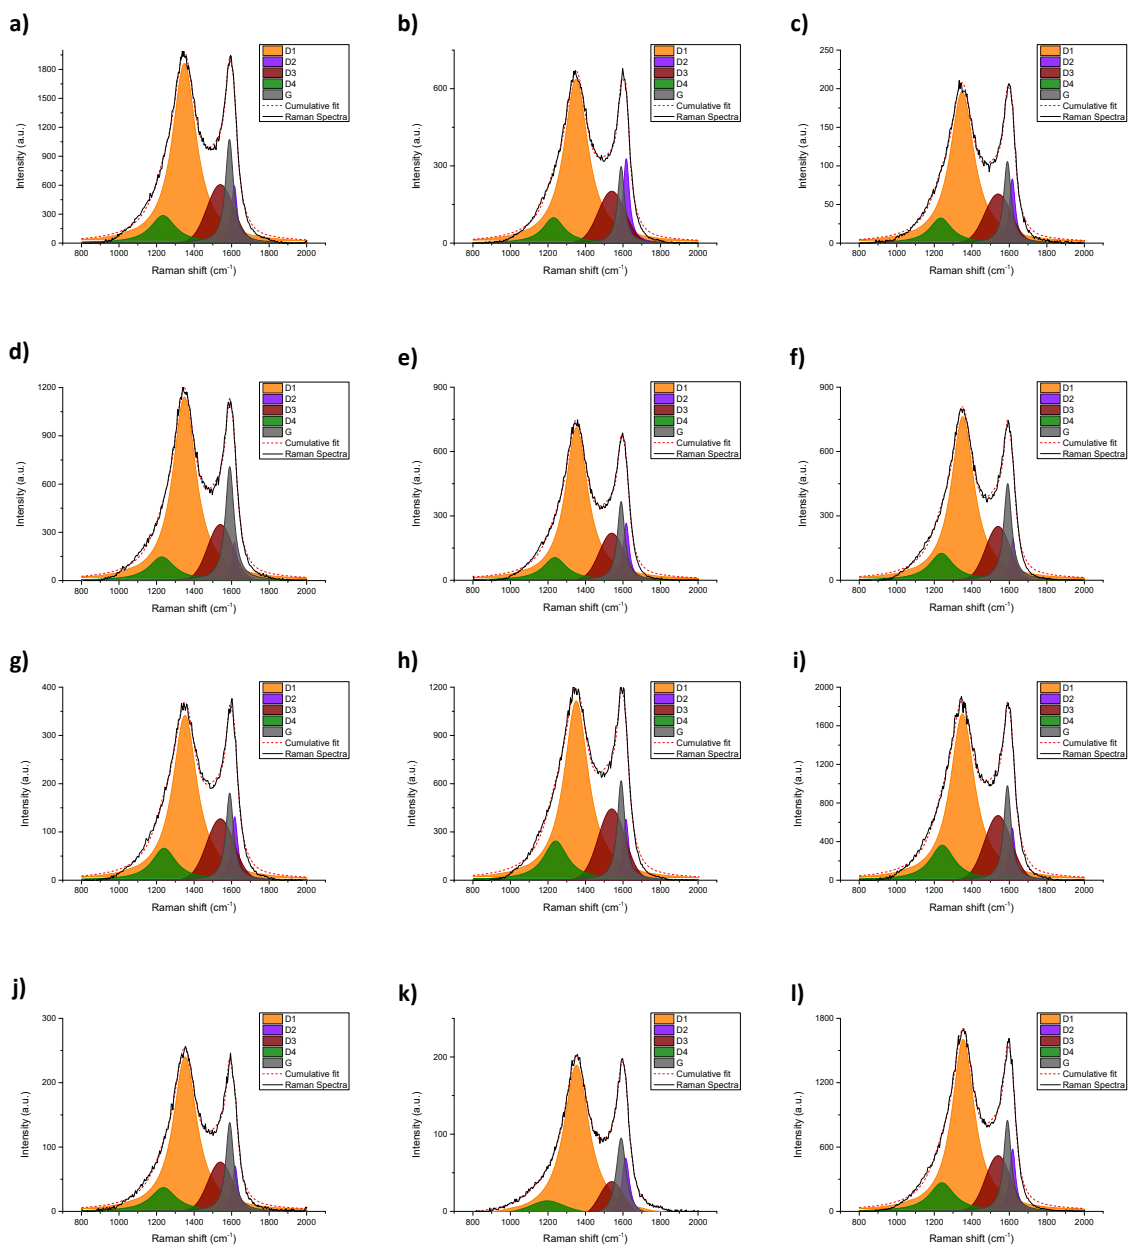

Fig. S16. Raman peaks deconvolution for HCl-800 (a–c), HCl-1000 (d–f), H<sub>2</sub>SO<sub>4</sub>-800 (g–i), and H<sub>2</sub>SO<sub>4</sub>-1000 (j–l) samples.



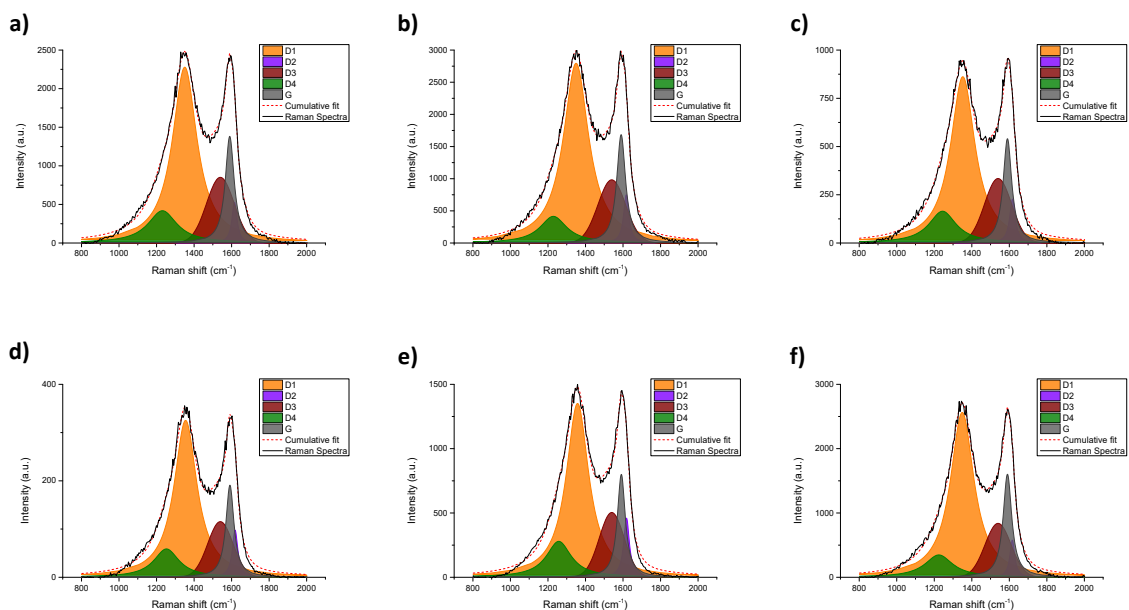

Fig. S17. Raman peaks deconvolution for  $H_3PO_4-800$  (a-c) and  $H_3PO_4-1000$  (d-f).

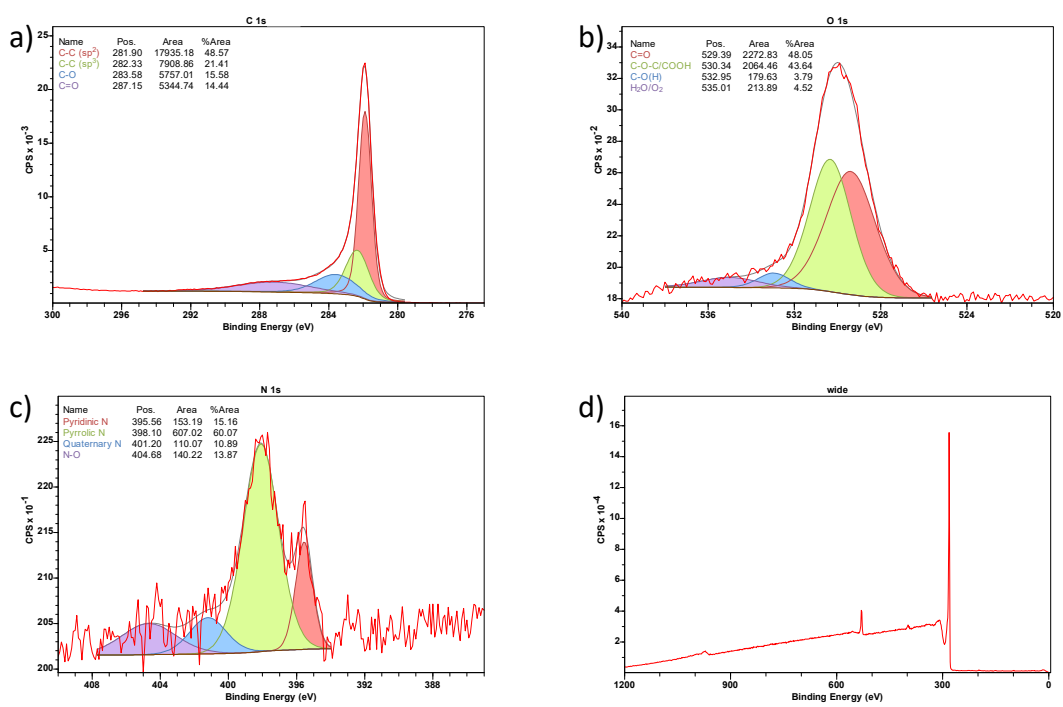

Fig. S18. XPS spectra of  $H_2O-800$ .

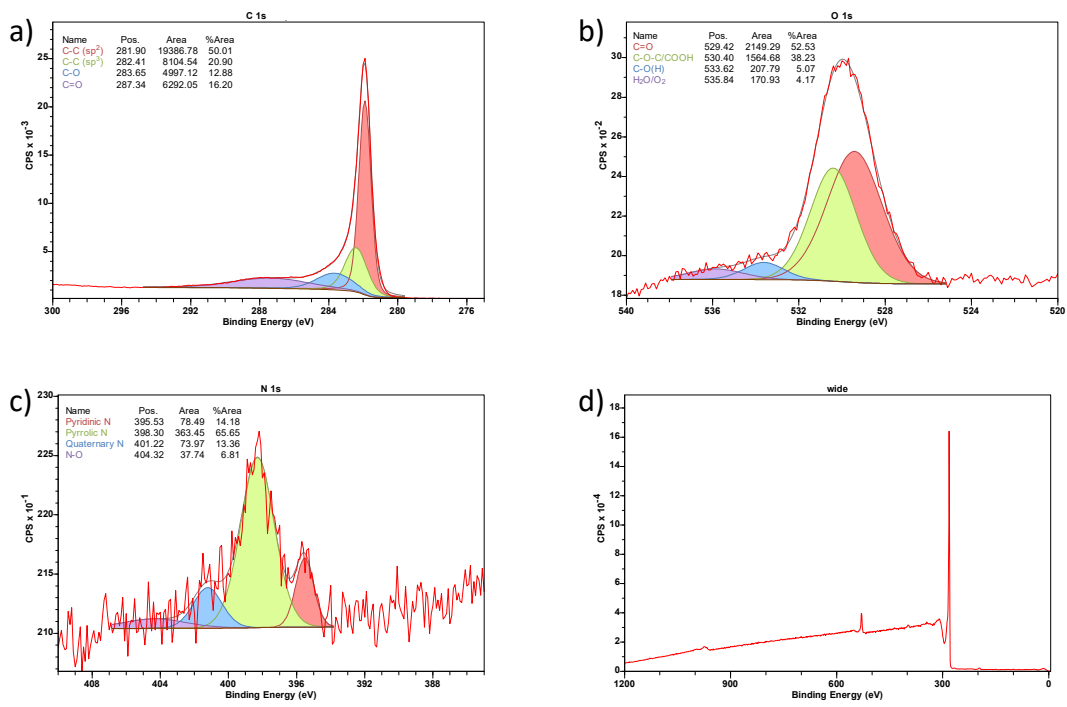

Fig. S19. XPS spectra of H<sub>2</sub>O-1000.

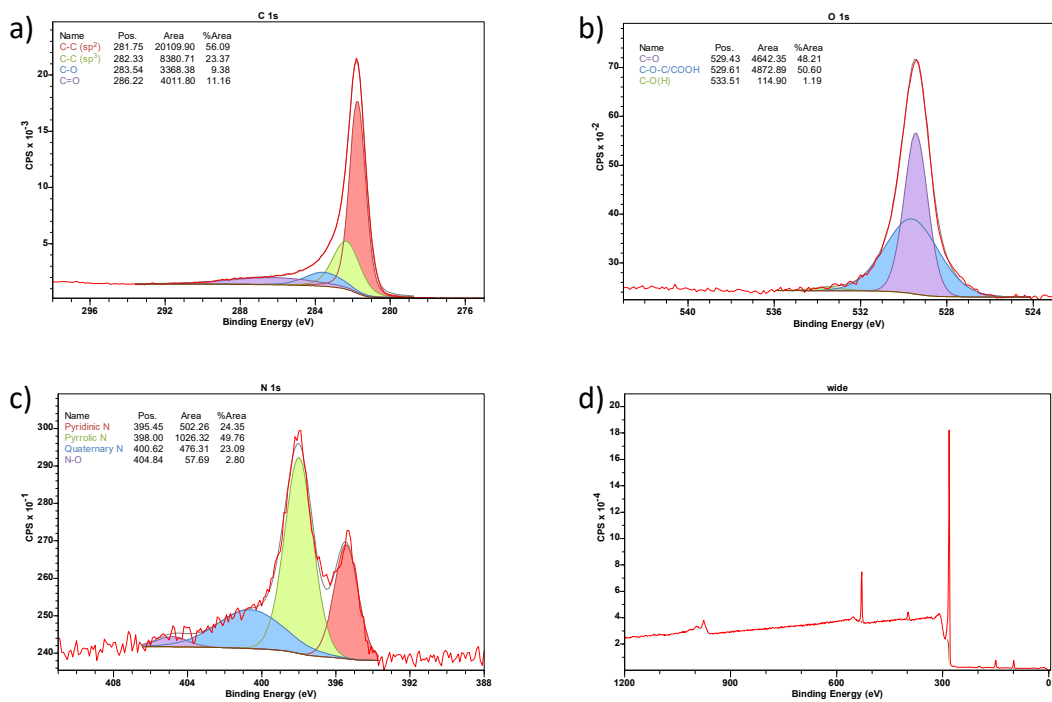

Fig. S20. XPS spectra of HNO<sub>3</sub>-800.

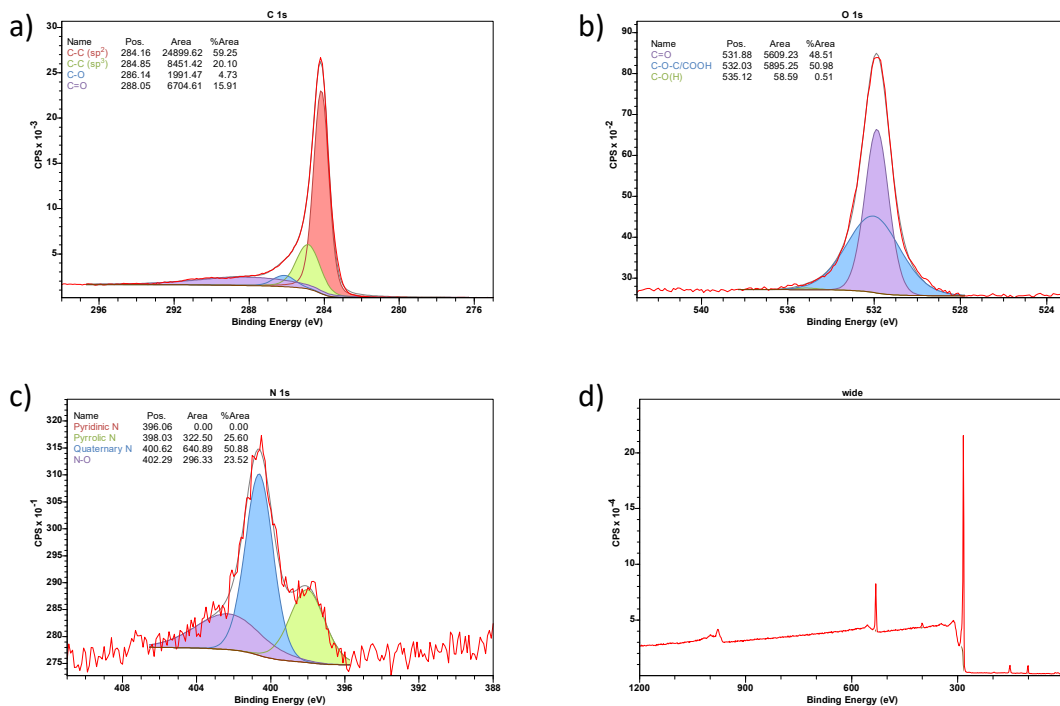

Fig. S21. XPS spectra of HNO<sub>3</sub>-1000.

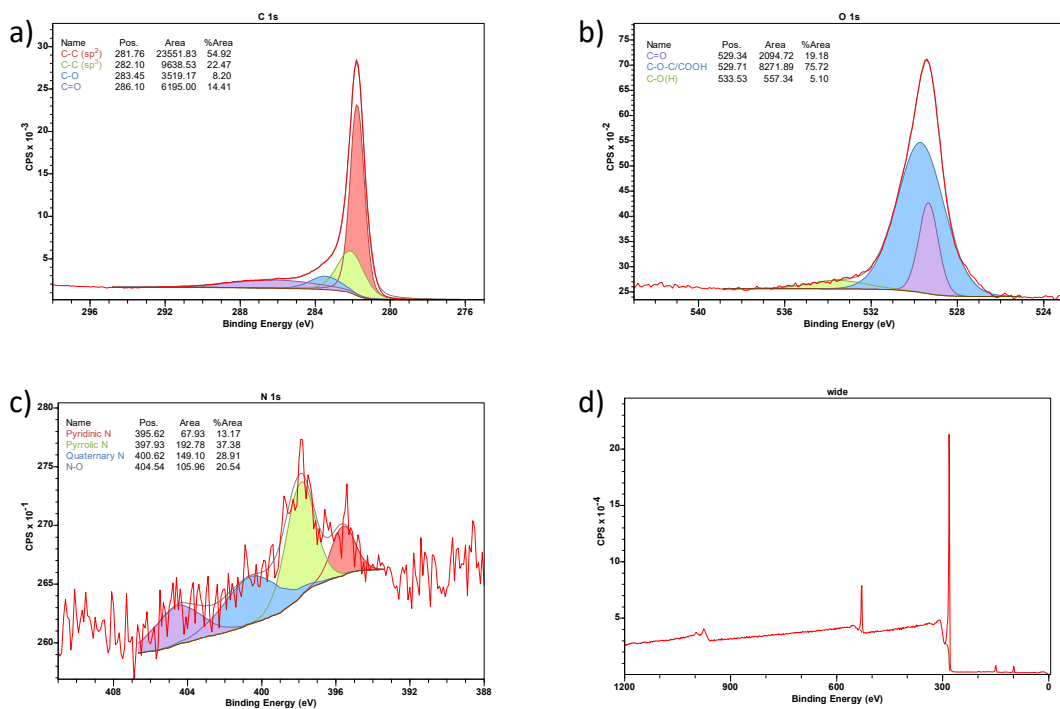

Fig. S22. XPS spectra of HCl-800.

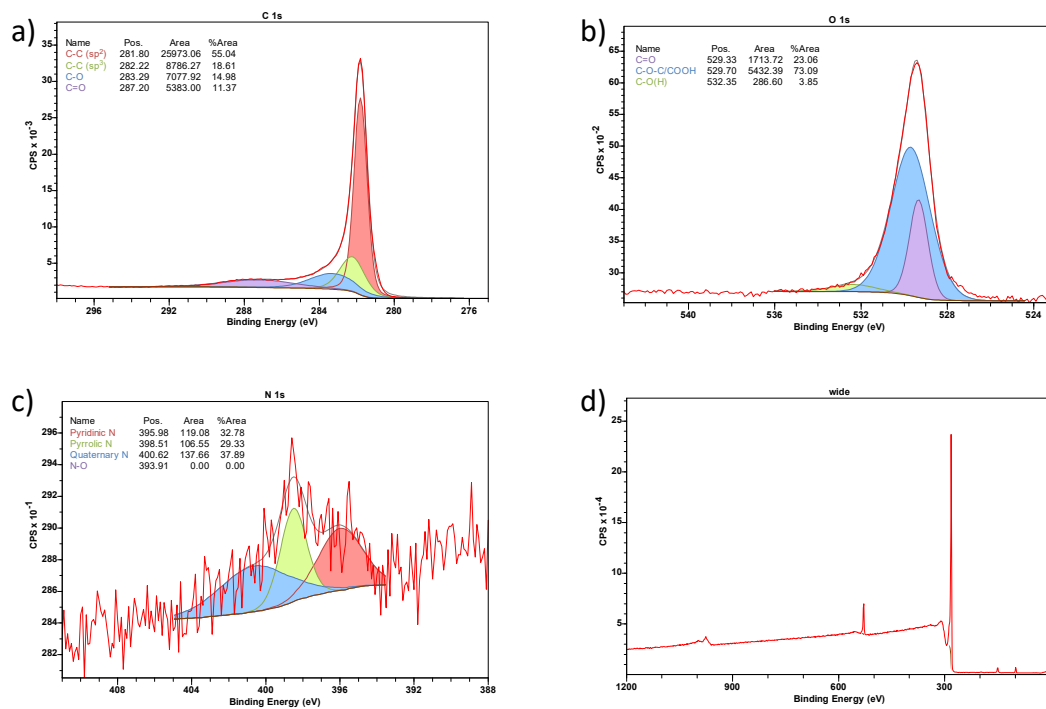

Fig. S23. XPS spectra of HCl-1000.

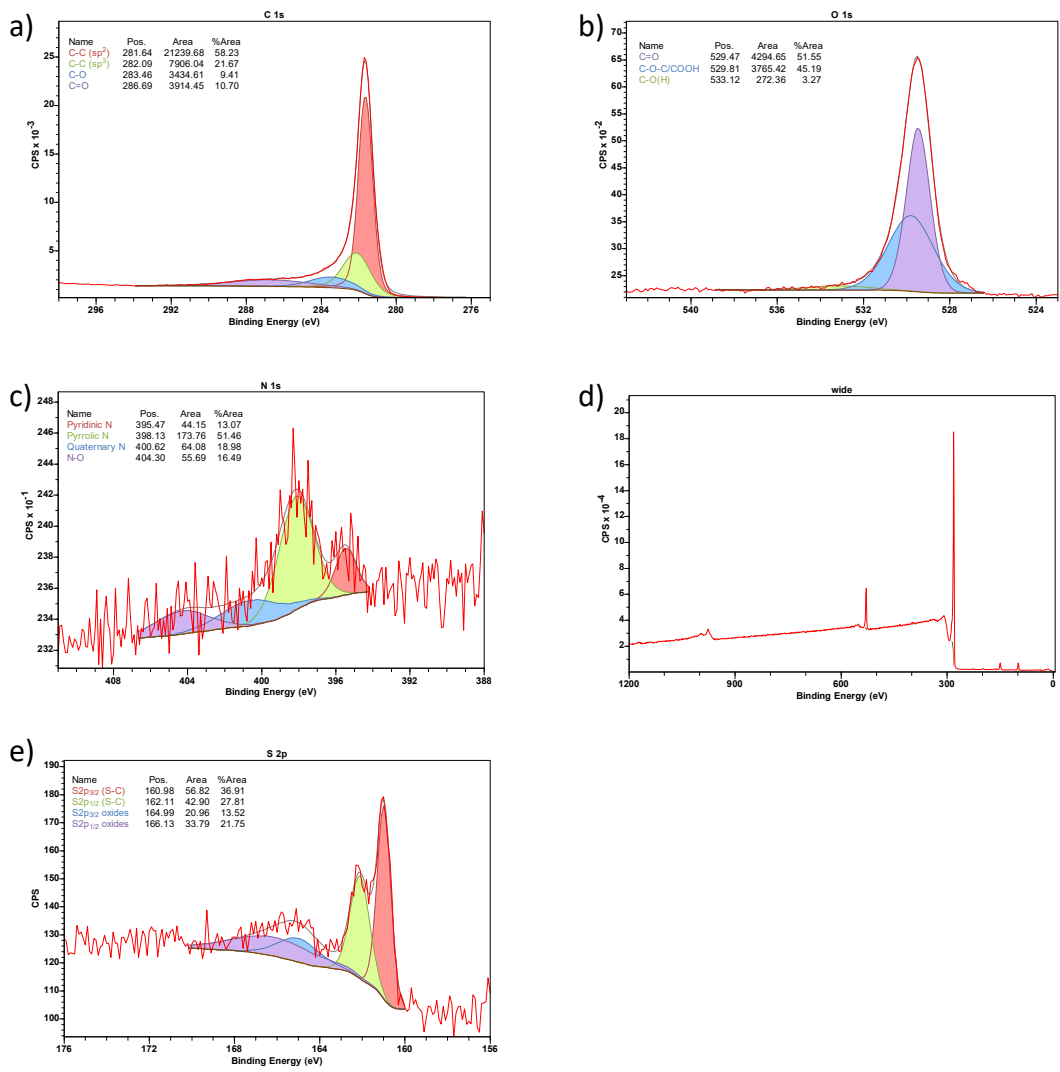

Fig. S24. XPS spectra of H<sub>2</sub>SO<sub>4</sub>-800.

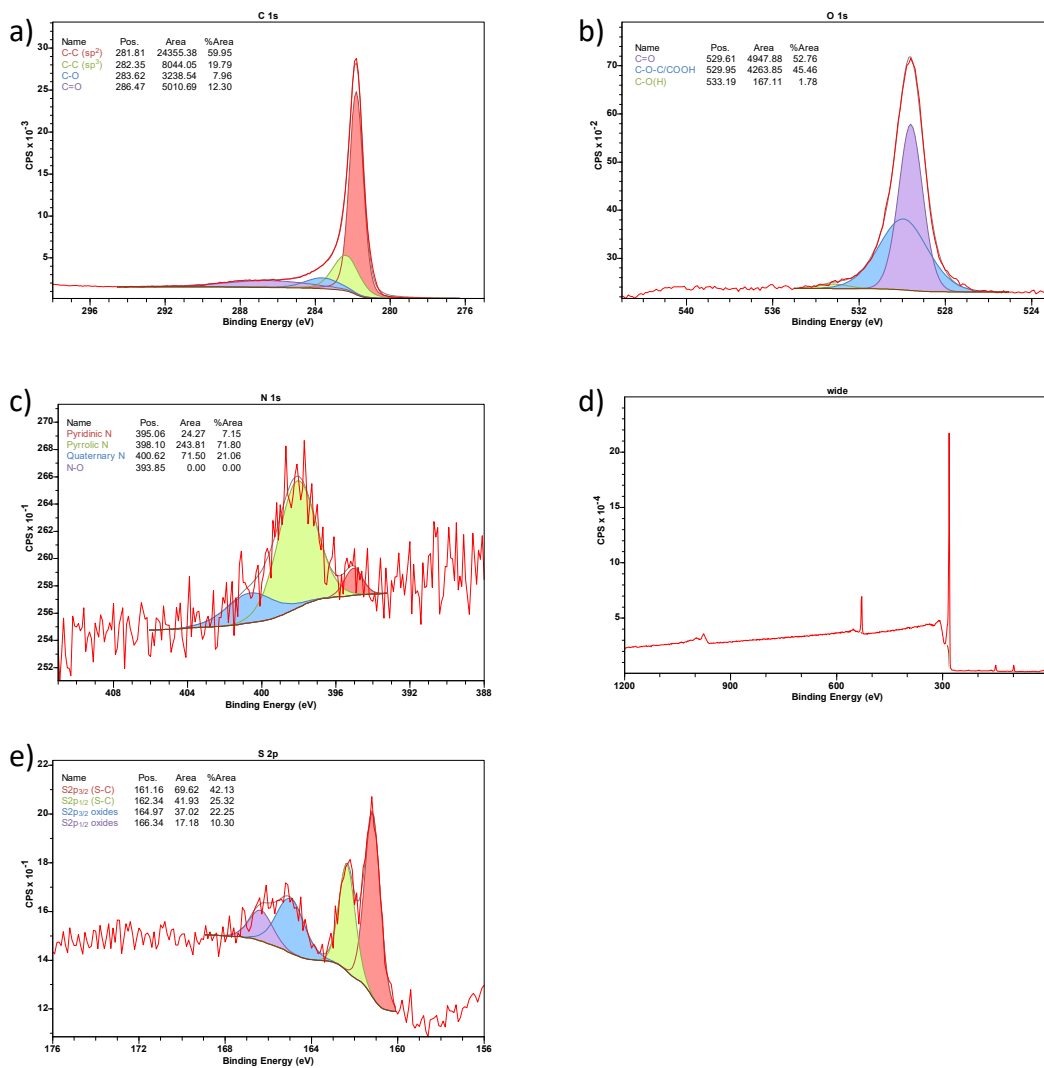

Fig. S25. XPS spectra of H<sub>2</sub>SO<sub>4</sub>-1000.

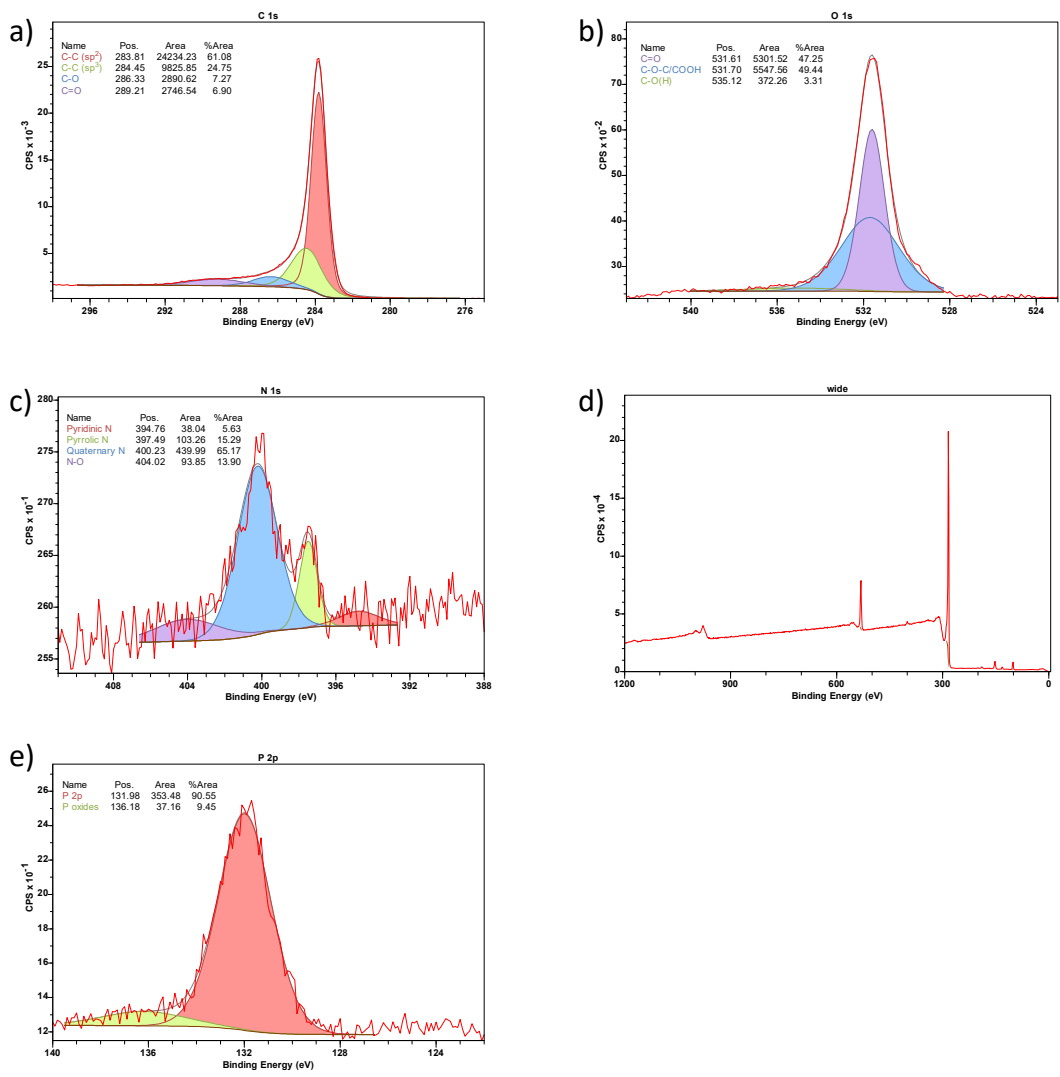

Fig. S26. XPS spectra of H<sub>3</sub>PO<sub>4</sub>-800.

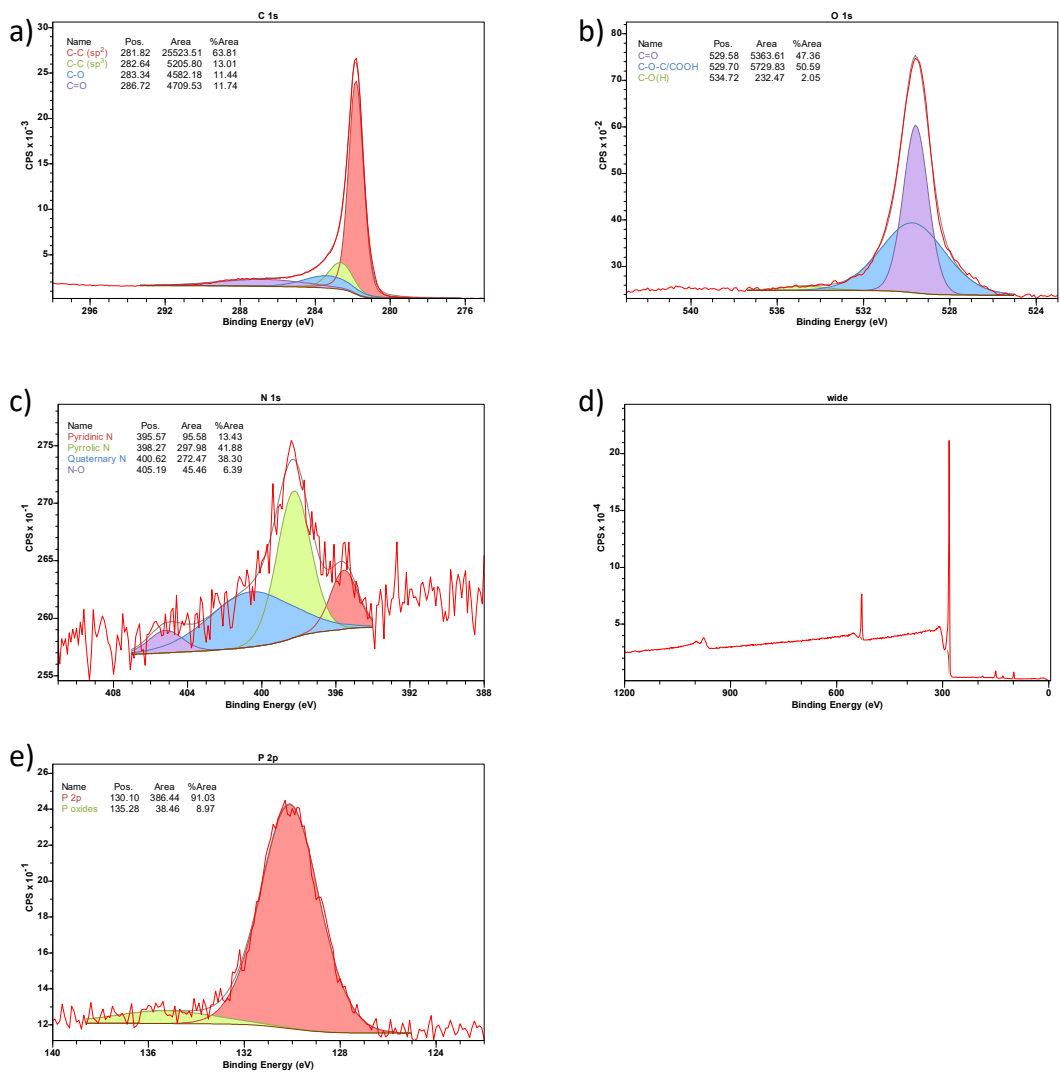

Fig. S27. XPS spectra of H<sub>3</sub>PO<sub>4</sub>-1000.



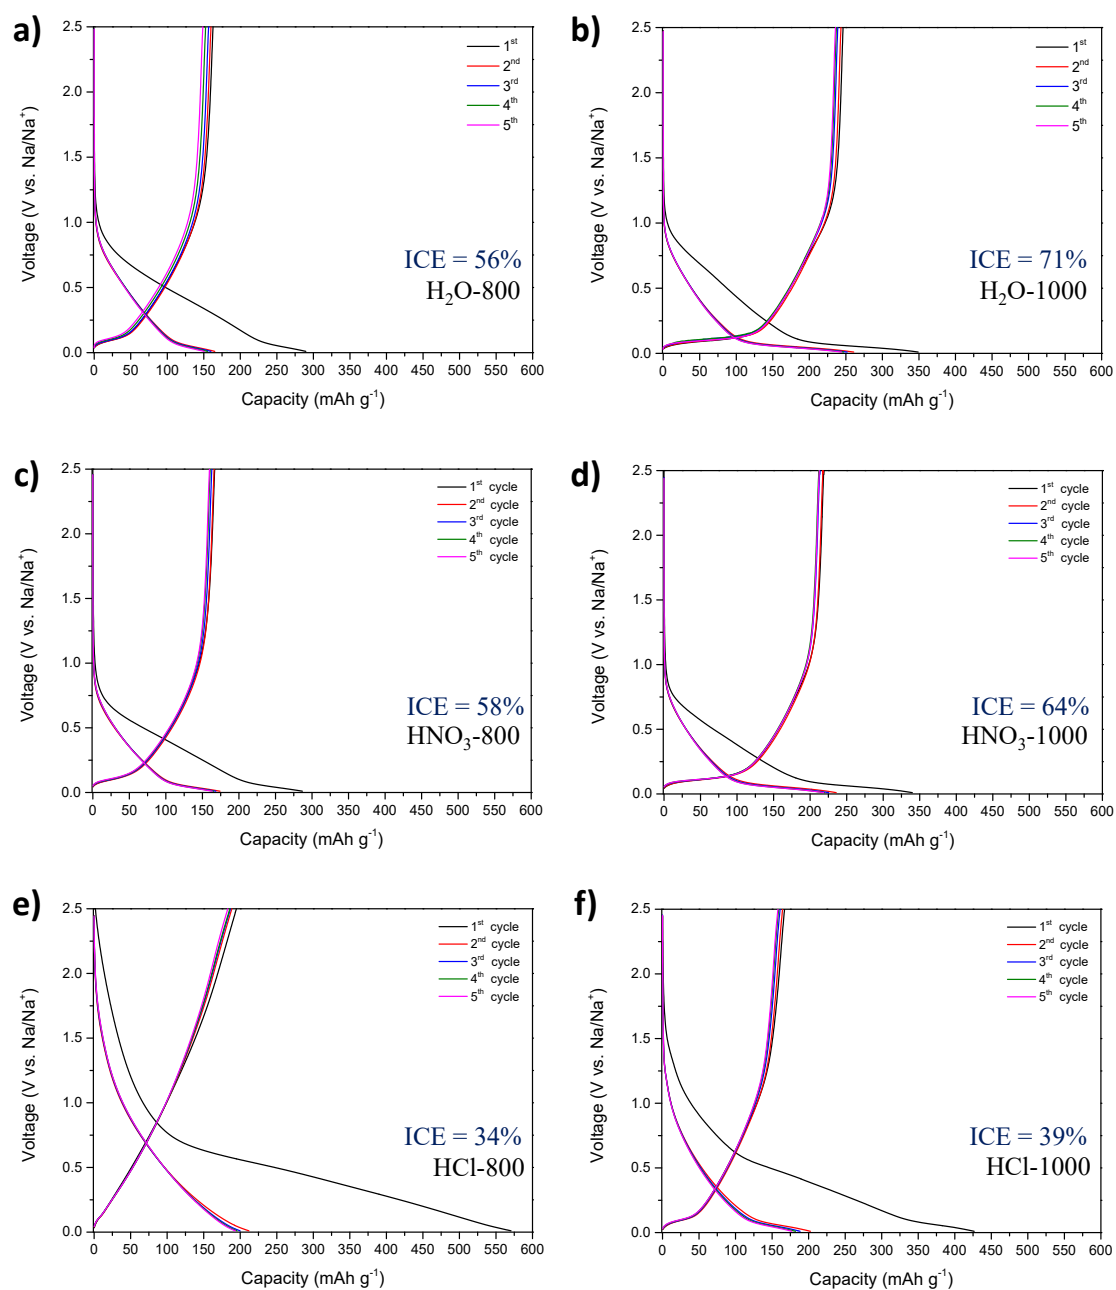

Fig. S28. Galvanostatic dis/charge profiles at a current rate of  $0.1 \text{ Ag}^{-1}$  in NaTFSI/EC:DMC for (a) H<sub>2</sub>O-800, (b) H<sub>2</sub>O-1000, (c) HNO<sub>3</sub>-800, (d) HNO<sub>3</sub>-1000, (e) HCl-800, and (f) HCl-1000.

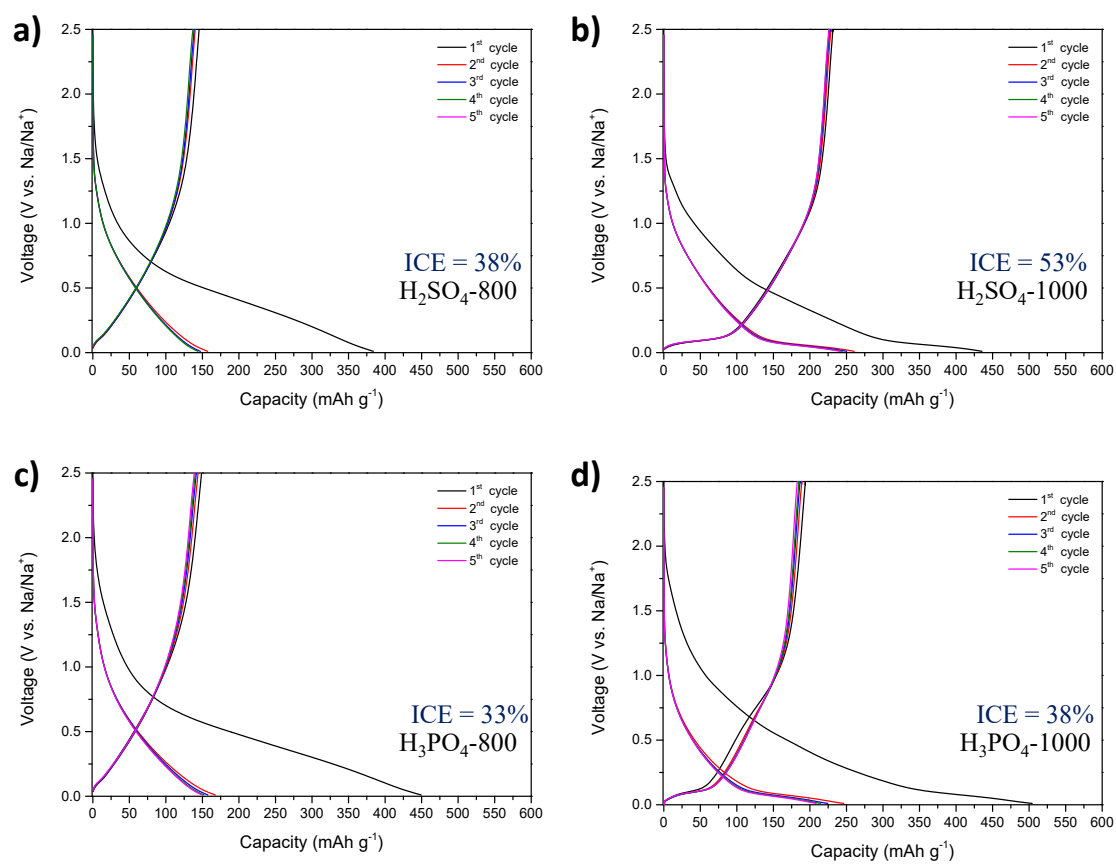

Fig. S29. Galvanostatic dis/charge profiles at a current rate of  $0.1 \text{ Ag}^{-1}$  in NaTFSI/EC:DMC for (a)  $\text{H}_2\text{SO}_4\text{-800}$ , (b)  $\text{H}_2\text{SO}_4\text{-1000}$ , (c)  $\text{H}_3\text{PO}_4\text{-800}$ , and (d)  $\text{H}_3\text{PO}_4\text{-1000}$ .

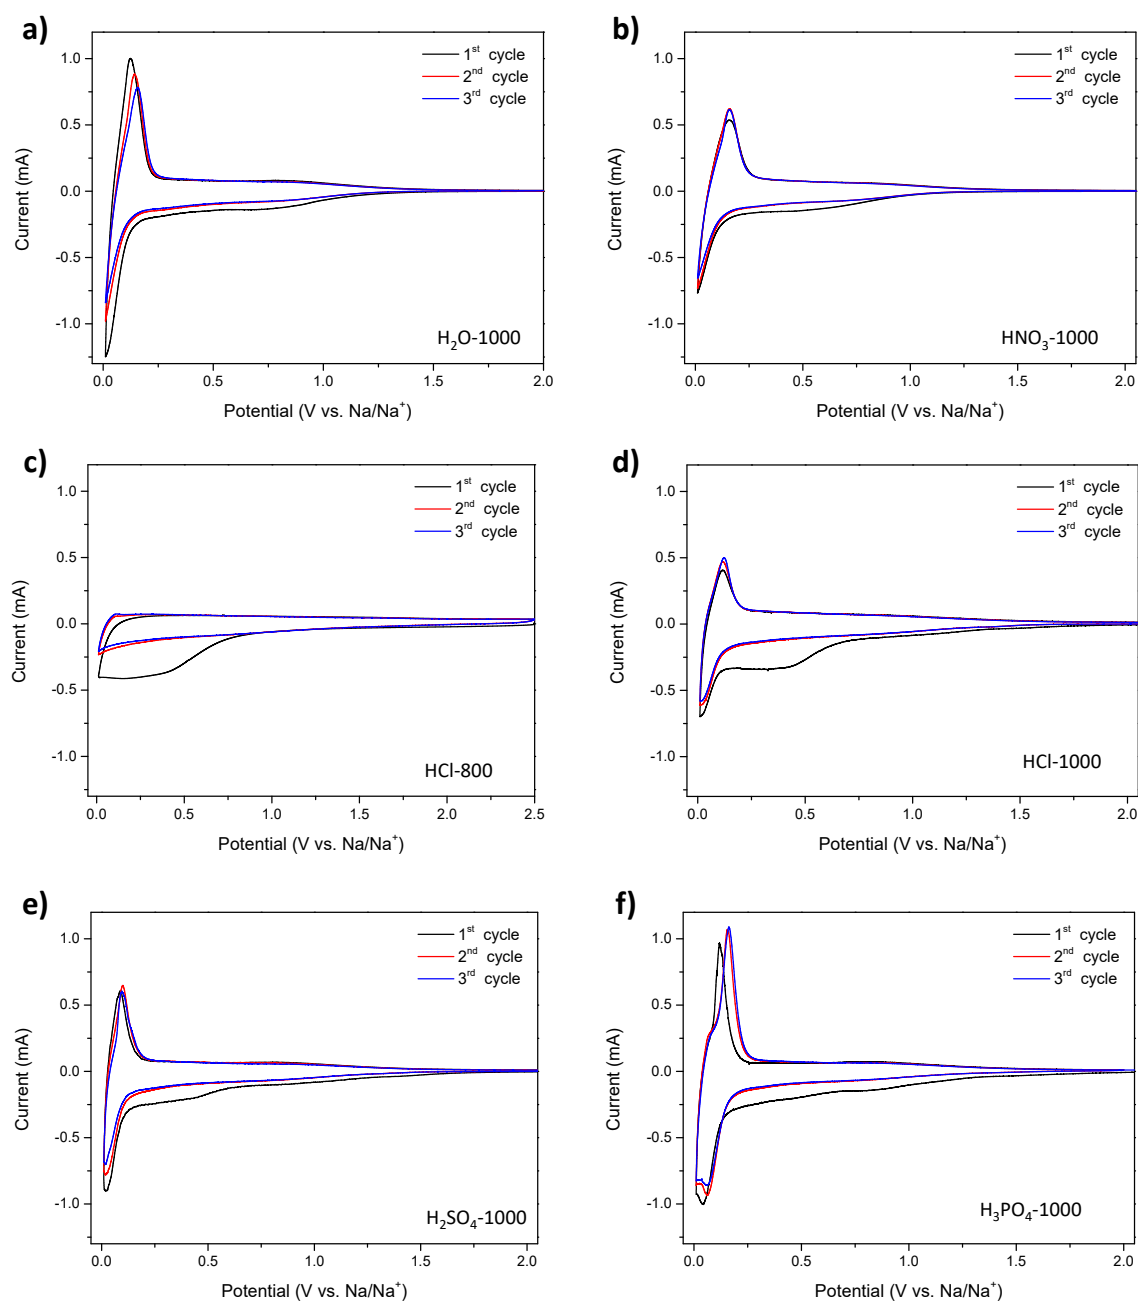

Fig. S30. CV curves of the first five cycles of (a) H<sub>2</sub>O-1000, (b) HNO<sub>3</sub>-1000, (c) HCl-800, (d) HCl-1000, (e) H<sub>2</sub>SO<sub>4</sub>-1000, and (f) H<sub>3</sub>PO<sub>4</sub>-1000 cycled in NaTFSI/DC:DMC electrolyte.

Table S3. Capacity of HCs annealed at 800 °C along cycles at different applied current intensities in NaTFSI\_EC:DMC (results referred to the mass of active material in the electrode)

| Cycle (A g <sup>-1</sup> ) | H <sub>2</sub> O-1000            |                               | HNO <sub>3</sub> -1000           |                               | HCl-1000                         |                               | H <sub>2</sub> SO <sub>4</sub> -1000 |                               | H <sub>3</sub> PO <sub>4</sub> -1000 |                               |
|----------------------------|----------------------------------|-------------------------------|----------------------------------|-------------------------------|----------------------------------|-------------------------------|--------------------------------------|-------------------------------|--------------------------------------|-------------------------------|
|                            | Discharge (mAh g <sup>-1</sup> ) | Charge (mAh g <sup>-1</sup> ) | Discharge (mAh g <sup>-1</sup> ) | Charge (mAh g <sup>-1</sup> ) | Discharge (mAh g <sup>-1</sup> ) | Charge (mAh g <sup>-1</sup> ) | Discharge (mAh g <sup>-1</sup> )     | Charge (mAh g <sup>-1</sup> ) | Discharge (mAh g <sup>-1</sup> )     | Charge (mAh g <sup>-1</sup> ) |
| 1 (0.1)                    | 289                              | 162                           | 287                              | 167                           | 571                              | 195                           | 384                                  | 146                           | 449                                  | 149                           |
| 2 (0.1)                    | 165                              | 160                           | 174                              | 166                           | 212                              | 188                           | 157                                  | 140                           | 168                                  | 144                           |
| 3 (0.1)                    | 160                              | 157                           | 168                              | 163                           | 200                              | 187                           | 147                                  | 139                           | 158                                  | 142                           |
| 4 (0.1)                    | 155                              | 153                           | 165                              | 160                           | 196                              | 186                           | 144                                  | 137                           | 152                                  | 140                           |
| 5 (0.1)                    | 151                              | 149                           | 163                              | 160                           | 193                              | 183                           | 142                                  | 136                           | 149                                  | 139                           |
| 6 (0.5)                    | 104                              | 92                            | 105                              | 92                            | 171                              | 146                           | 121                                  | 106                           | 123                                  | 104                           |
| 7 (0.5)                    | 91                               | 90                            | 94                               | 93                            | 149                              | 145                           | 105                                  | 104                           | 105                                  | 102                           |
| 8 (0.5)                    | 90                               | 90                            | 95                               | 94                            | 149                              | 146                           | 104                                  | 103                           | 103                                  | 101                           |
| 9 (0.5)                    | 91                               | 90                            | 95                               | 94                            | 149                              | 146                           | 103                                  | 102                           | 102                                  | 101                           |
| 10 (0.5)                   | 91                               | 91                            | 96                               | 96                            | 148                              | 146                           | 103                                  | 101                           | 102                                  | 100                           |
| 11 (1)                     | 77                               | 72                            | 74                               | 69                            | 137                              | 126                           | 90                                   | 84                            | 87                                   | 79                            |
| 12 (1)                     | 73                               | 72                            | 70                               | 70                            | 128                              | 125                           | 84                                   | 84                            | 80                                   | 79                            |
| 13 (1)                     | 73                               | 73                            | 70                               | 70                            | 127                              | 125                           | 84                                   | 84                            | 80                                   | 80                            |
| 14 (1)                     | 73                               | 73                            | 71                               | 70                            | 127                              | 125                           | 84                                   | 84                            | 80                                   | 79                            |
| 15 (1)                     | 74                               | 74                            | 71                               | 70                            | 126                              | 125                           | 84                                   | 84                            | 81                                   | 80                            |
| 16 (2)                     | 57                               | 52                            | 50                               | 45                            | 111                              | 102                           | 69                                   | 63                            | 64                                   | 57                            |
| 17 (2)                     | 53                               | 53                            | 46                               | 45                            | 103                              | 102                           | 65                                   | 65                            | 59                                   | 59                            |
| 18 (2)                     | 53                               | 53                            | 46                               | 45                            | 103                              | 102                           | 65                                   | 65                            | 60                                   | 59                            |
| 19 (2)                     | 53                               | 53                            | 46                               | 45                            | 103                              | 102                           | 65                                   | 65                            | 59                                   | 59                            |
| 20 (2)                     | 53                               | 53                            | 45                               | 45                            | 102                              | 102                           | 65                                   | 65                            | 60                                   | 59                            |
| 21 (0.1)                   | 130                              | 153                           | 147                              | 167                           | 141                              | 177                           | 110                                  | 133                           | 111                                  | 136                           |
| 22 (0.1)                   | 152                              | 151                           | 170                              | 166                           | 183                              | 177                           | 136                                  | 132                           | 142                                  | 136                           |
| 23 (0.1)                   | 151                              | 149                           | 169                              | 166                           | 183                              | 177                           | 134                                  | 131                           | 141                                  | 135                           |
| 24 (0.1)                   | 150                              | 149                           | 169                              | 165                           | 182                              | 176                           | 134                                  | 130                           | 140                                  | 134                           |
| 25 (0.1)                   | 150                              | 149                           | 168                              | 165                           | 181                              | 176                           | 133                                  | 130                           | 139                                  | 134                           |

Table S4. Capacity of HCs annealed at 1000 °C along cycles at different applied current intensities in NaTFSI\_EC:DMC (results referred to the mass of active material in the electrode)

| Cycle ( $A\ g^{-1}$ ) | H <sub>2</sub> O-1000            |                               | HNO <sub>3</sub> -1000           |                               | HCl-1000                         |                               | H <sub>2</sub> SO <sub>4</sub> -1000 |                               | H <sub>3</sub> PO <sub>4</sub> -1000 |                               |
|-----------------------|----------------------------------|-------------------------------|----------------------------------|-------------------------------|----------------------------------|-------------------------------|--------------------------------------|-------------------------------|--------------------------------------|-------------------------------|
|                       | Discharge (mAh g <sup>-1</sup> ) | Charge (mAh g <sup>-1</sup> ) | Discharge (mAh g <sup>-1</sup> ) | Charge (mAh g <sup>-1</sup> ) | Discharge (mAh g <sup>-1</sup> ) | Charge (mAh g <sup>-1</sup> ) | Discharge (mAh g <sup>-1</sup> )     | Charge (mAh g <sup>-1</sup> ) | Discharge (mAh g <sup>-1</sup> )     | Charge (mAh g <sup>-1</sup> ) |
| 1 (0.1)               | 349                              | 246                           | 341                              | 219                           | 427                              | 167                           | 438                                  | 232                           | 506                                  | 194                           |
| 2 (0.1)               | 261                              | 243                           | 237                              | 218                           | 202                              | 164                           | 261                                  | 230                           | 247                                  | 190                           |
| 3 (0.1)               | 252                              | 239                           | 226                              | 214                           | 188                              | 161                           | 251                                  | 228                           | 225                                  | 187                           |
| 4 (0.1)               | 247                              | 237                           | 220                              | 213                           | 182                              | 159                           | 245                                  | 228                           | 216                                  | 186                           |
| 5 (0.1)               | 244                              | 236                           | 219                              | 213                           | 177                              | 158                           | 243                                  | 227                           | 209                                  | 183                           |
| 6 (0.5)               | 122                              | 110                           | 105                              | 93                            | 137                              | 122                           | 189                                  | 173                           | 166                                  | 147                           |
| 7 (0.5)               | 104                              | 102                           | 89                               | 88                            | 123                              | 118                           | 167                                  | 163                           | 144                                  | 139                           |
| 8 (0.5)               | 101                              | 101                           | 86                               | 85                            | 122                              | 118                           | 166                                  | 164                           | 137                                  | 133                           |
| 9 (0.5)               | 101                              | 101                           | 85                               | 85                            | 122                              | 118                           | 170                                  | 167                           | 132                                  | 129                           |
| 10 (0.5)              | 102                              | 101                           | 84                               | 84                            | 123                              | 119                           | 171                                  | 169                           | 129                                  | 126                           |
| 11 (1)                | 75                               | 71                            | 60                               | 55                            | 103                              | 96                            | 133                                  | 126                           | 101                                  | 94                            |
| 12 (1)                | 73                               | 72                            | 56                               | 56                            | 99                               | 97                            | 128                                  | 126                           | 89                                   | 88                            |
| 13 (1)                | 73                               | 72                            | 56                               | 56                            | 100                              | 98                            | 129                                  | 127                           | 85                                   | 84                            |
| 14 (1)                | 72                               | 72                            | 56                               | 56                            | 101                              | 99                            | 130                                  | 129                           | 81                                   | 80                            |
| 15 (1)                | 72                               | 72                            | 56                               | 56                            | 101                              | 100                           | 128                                  | 127                           | 78                                   | 77                            |
| 16 (2)                | 52                               | 48                            | 34                               | 30                            | 83                               | 77                            | 98                                   | 92                            | 57                                   | 52                            |
| 17 (2)                | 50                               | 50                            | 32                               | 32                            | 79                               | 79                            | 93                                   | 92                            | 51                                   | 50                            |
| 18 (2)                | 50                               | 50                            | 32                               | 32                            | 81                               | 80                            | 93                                   | 92                            | 49                                   | 49                            |
| 19 (2)                | 50                               | 50                            | 32                               | 32                            | 80                               | 79                            | 92                                   | 92                            | 48                                   | 48                            |
| 20 (2)                | 50                               | 50                            | 32                               | 32                            | 79                               | 78                            | 92                                   | 92                            | 47                                   | 47                            |
| 21 (0.1)              | 219                              | 233                           | 194                              | 209                           | 148                              | 158                           | 211                                  | 225                           | 158                                  | 170                           |
| 22 (0.1)              | 233                              | 228                           | 210                              | 207                           | 169                              | 157                           | 233                                  | 224                           | 178                                  | 167                           |
| 23 (0.1)              | 232                              | 228                           | 209                              | 206                           | 168                              | 157                           | 232                                  | 224                           | 175                                  | 165                           |
| 24 (0.1)              | 233                              | 228                           | 207                              | 204                           | 167                              | 156                           | 231                                  | 225                           | 173                                  | 164                           |
| 25 (0.1)              | 233                              | 229                           | 206                              | 204                           | 166                              | 156                           | 232                                  | 224                           | 171                                  | 163                           |

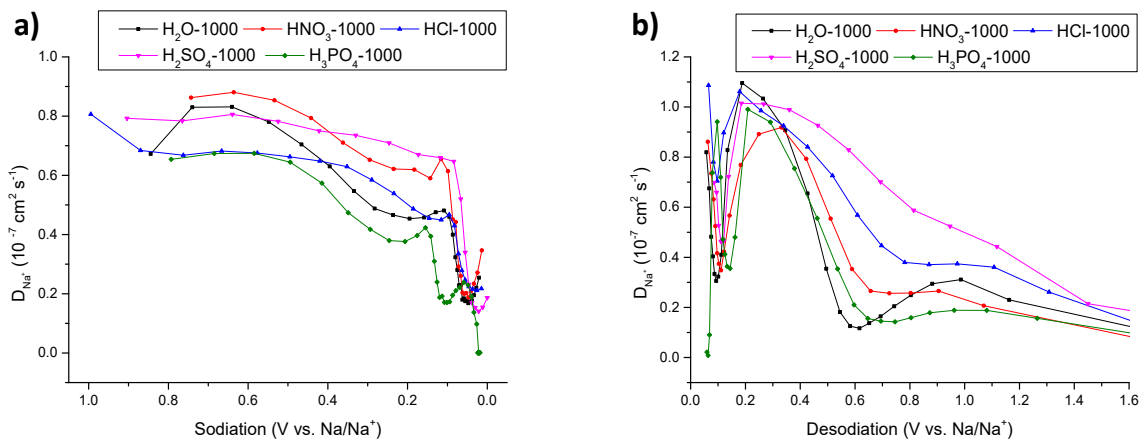

Fig. S31.  $D_{Na^+}$  values calculated from GITT measurements along c) sodiation and d) desodiation in NaTFSI/EC:DMC electrolyte.

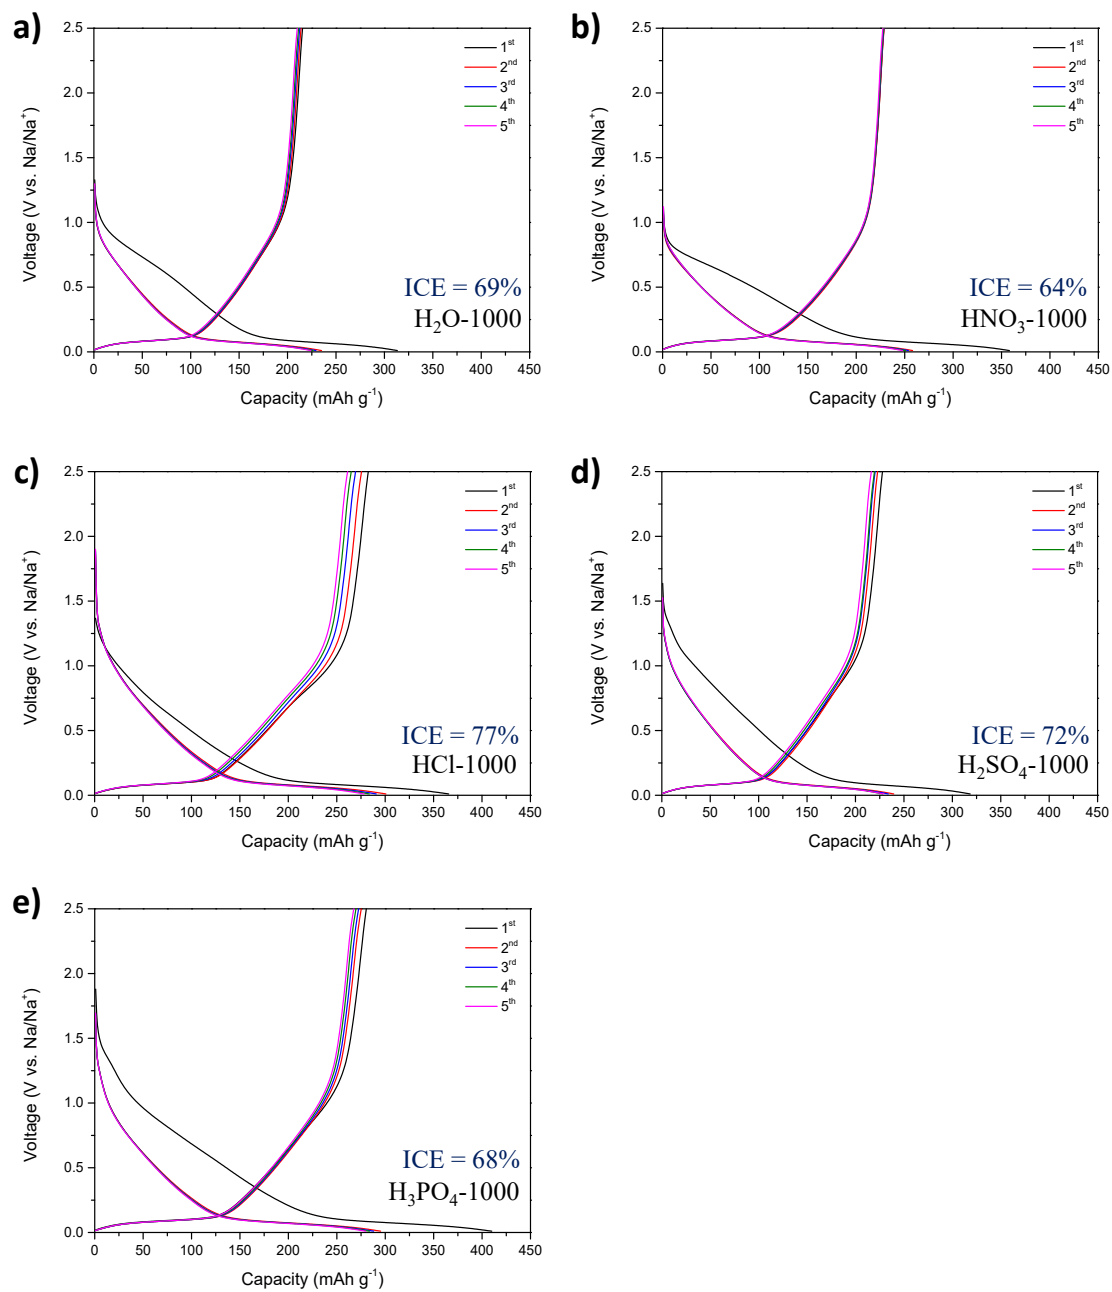

Fig. S32. Galvanostatic dis/charge profiles at a current rate of  $0.1 \text{ Ag}^{-1}$  in  $\text{NaPF}_6/\text{DGM}$  for a)  $\text{H}_2\text{O}$ -1000, b)  $\text{HNO}_3$ -1000, c)  $\text{HCl}$ -1000, d)  $\text{H}_2\text{SO}_4$ -1000, and e)  $\text{H}_3\text{PO}_4$ -1000.

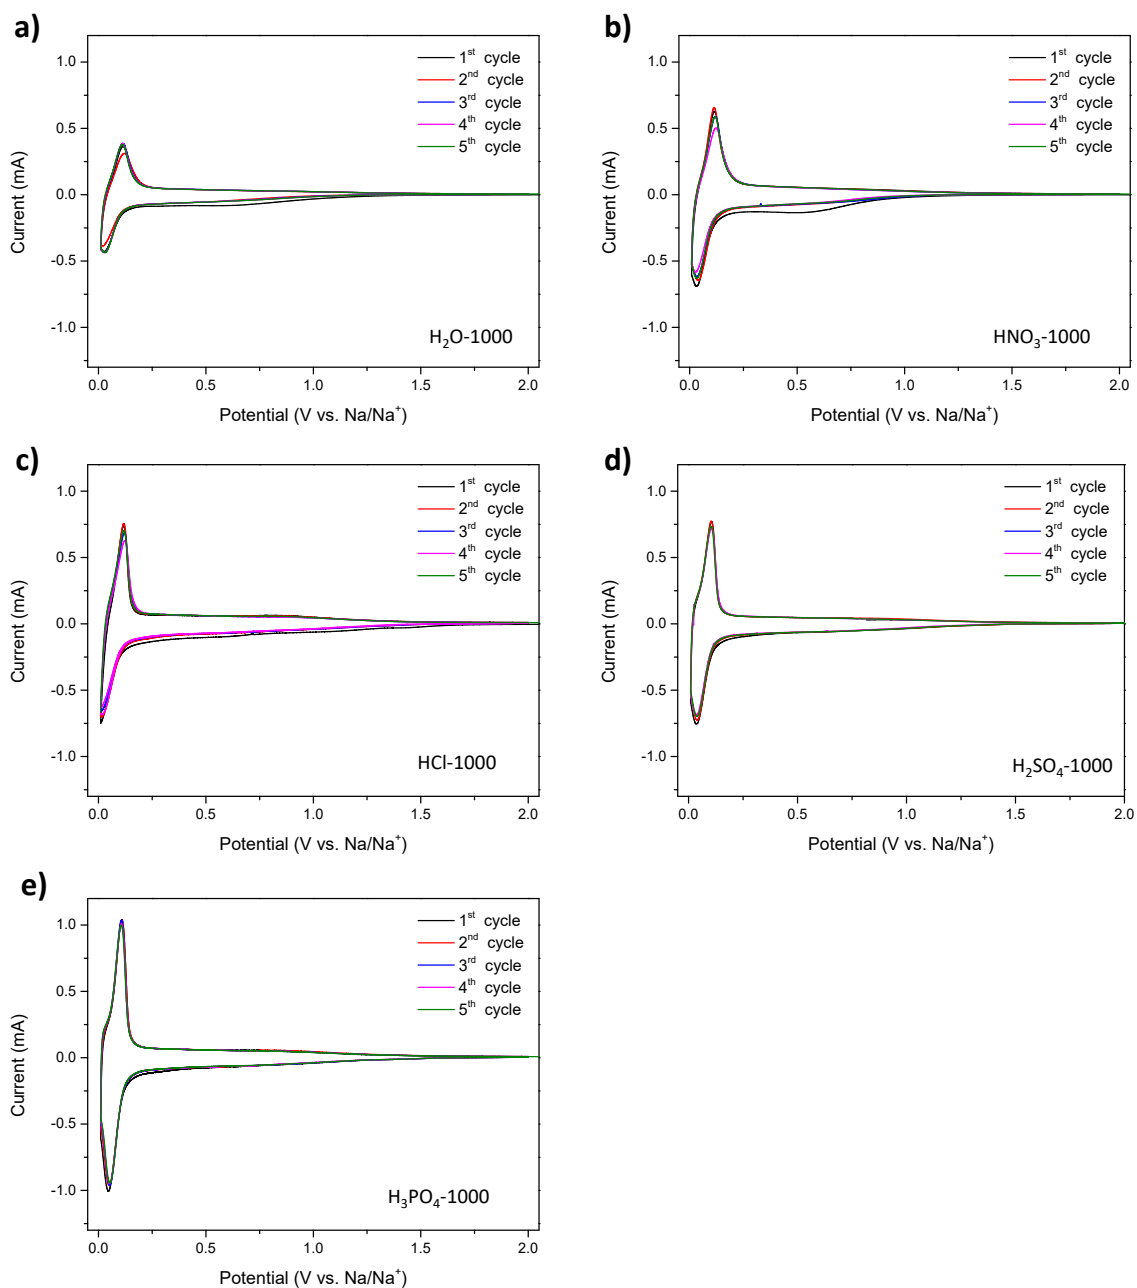

Fig. S33. CV curves of the first five cycles of a) H<sub>2</sub>O-1000, b) HNO<sub>3</sub>-1000, c) HCl-1000, d) H<sub>2</sub>SO<sub>4</sub>-1000, and e) H<sub>3</sub>PO<sub>4</sub>-1000 cycled in NaPF<sub>6</sub>/DGM electrolyte.



Table S5. Capacity of HCs along cycles at different applied current intensities in NaPF<sub>6</sub>/DGM (results referred to the mass of active material in the electrode)

| Cycle (A g <sup>-1</sup> ) | H <sub>2</sub> O-1000            |                               | HNO <sub>3</sub> -1000           |                               | HCl-1000                         |                               | H <sub>2</sub> SO <sub>4</sub> -1000 |                               | H <sub>3</sub> PO <sub>4</sub> -1000 |                               |
|----------------------------|----------------------------------|-------------------------------|----------------------------------|-------------------------------|----------------------------------|-------------------------------|--------------------------------------|-------------------------------|--------------------------------------|-------------------------------|
|                            | Discharge (mAh g <sup>-1</sup> ) | Charge (mAh g <sup>-1</sup> ) | Discharge (mAh g <sup>-1</sup> ) | Charge (mAh g <sup>-1</sup> ) | Discharge (mAh g <sup>-1</sup> ) | Charge (mAh g <sup>-1</sup> ) | Discharge (mAh g <sup>-1</sup> )     | Charge (mAh g <sup>-1</sup> ) | Discharge (mAh g <sup>-1</sup> )     | Charge (mAh g <sup>-1</sup> ) |
| 1 (0.1)                    | 313                              | 215                           | 358                              | 229                           | 366                              | 283                           | 318                                  | 228                           | 413                                  | 281                           |
| 2 (0.1)                    | 235                              | 214                           | 258                              | 229                           | 301                              | 276                           | 240                                  | 223                           | 295                                  | 275                           |
| 3 (0.1)                    | 229                              | 213                           | 254                              | 228                           | 291                              | 269                           | 234                                  | 220                           | 288                                  | 273                           |
| 4 (0.1)                    | 226                              | 211                           | 251                              | 228                           | 284                              | 265                           | 228                                  | 220                           | 284                                  | 270                           |
| 5 (0.1)                    | 224                              | 210                           | 248                              | 227                           | 278                              | 261                           | 229                                  | 216                           | 280                                  | 268                           |
| 6 (0.5)                    | 204                              | 188                           | 214                              | 194                           | 255                              | 241                           | 213                                  | 200                           | 260                                  | 245                           |
| 7 (0.5)                    | 191                              | 188                           | 200                              | 195                           | 244                              | 240                           | 202                                  | 198                           | 247                                  | 244                           |
| 8 (0.5)                    | 190                              | 187                           | 199                              | 195                           | 242                              | 239                           | 200                                  | 197                           | 245                                  | 242                           |
| 9 (0.5)                    | 189                              | 186                           | 198                              | 195                           | 241                              | 237                           | 199                                  | 196                           | 244                                  | 241                           |
| 10 (0.5)                   | 189                              | 186                           | 198                              | 195                           | 239                              | 236                           | 198                                  | 195                           | 243                                  | 240                           |
| 11 (1)                     | 179                              | 172                           | 180                              | 171                           | 231                              | 223                           | 192                                  | 187                           | 232                                  | 226                           |
| 12 (1)                     | 173                              | 172                           | 173                              | 171                           | 226                              | 223                           | 186                                  | 186                           | 226                                  | 225                           |
| 13 (1)                     | 173                              | 171                           | 173                              | 171                           | 225                              | 222                           | 186                                  | 185                           | 225                                  | 224                           |
| 14 (1)                     | 172                              | 171                           | 173                              | 171                           | 224                              | 221                           | 185                                  | 185                           | 224                                  | 224                           |
| 15 (1)                     | 172                              | 171                           | 173                              | 171                           | 223                              | 221                           | 184                                  | 184                           | 224                                  | 223                           |
| 16 (2)                     | 156                              | 149                           | 137                              | 130                           | 208                              | 202                           | 176                                  | 171                           | 206                                  | 200                           |
| 17 (2)                     | 150                              | 149                           | 131                              | 130                           | 203                              | 202                           | 171                                  | 171                           | 200                                  | 199                           |
| 18 (2)                     | 149                              | 149                           | 131                              | 130                           | 202                              | 201                           | 170                                  | 170                           | 199                                  | 199                           |
| 19 (2)                     | 149                              | 148                           | 131                              | 130                           | 202                              | 201                           | 170                                  | 170                           | 199                                  | 198                           |
| 20 (2)                     | 148                              | 148                           | 131                              | 130                           | 201                              | 200                           | 169                                  | 169                           | 198                                  | 198                           |
| 21 (0.1)                   | 188                              | 206                           | 208                              | 227                           | 241                              | 249                           | 195                                  | 209                           | 241                                  | 259                           |
| 22 (0.1)                   | 216                              | 205                           | 239                              | 227                           | 259                              | 248                           | 216                                  | 208                           | 264                                  | 256                           |
| 23 (0.1)                   | 216                              | 205                           | 239                              | 226                           | 255                              | 244                           | 216                                  | 206                           | 263                                  | 254                           |
| 24 (0.1)                   | 212                              | 203                           | 238                              | 226                           | 254                              | 242                           | 213                                  | 204                           | 262                                  | 253                           |
| 25 (0.1)                   | 212                              | 202                           | 237                              | 225                           | 252                              | 242                           | 210                                  | 202                           | 260                                  | 251                           |
| 26 (5)                     | 85                               | 62                            | 78                               | 53                            | 114                              | 94                            | 146                                  | 122                           | 104                                  | 80                            |
| 27 (5)                     | 67                               | 65                            | 57                               | 55                            | 99                               | 97                            | 127                                  | 125                           | 85                                   | 83                            |
| 28 (5)                     | 69                               | 67                            | 57                               | 56                            | 100                              | 99                            | 125                                  | 124                           | 85                                   | 84                            |
| 29 (5)                     | 71                               | 69                            | 58                               | 57                            | 100                              | 100                           | 124                                  | 124                           | 86                                   | 85                            |
| 30 (5)                     | 73                               | 71                            | 59                               | 58                            | 101                              | 100                           | 124                                  | 124                           | 86                                   | 85                            |
| 31 (8)                     | 49                               | 53                            | 41                               | 44                            | 86                               | 84                            | 95                                   | 99                            | 63                                   | 68                            |
| 32 (8)                     | 47                               | 53                            | 38                               | 45                            | 82                               | 84                            | 91                                   | 98                            | 60                                   | 68                            |
| 33 (8)                     | 47                               | 53                            | 38                               | 45                            | 82                               | 84                            | 91                                   | 98                            | 60                                   | 68                            |
| 34 (8)                     | 47                               | 53                            | 39                               | 45                            | 83                               | 84                            | 91                                   | 97                            | 61                                   | 67                            |
| 35 (8)                     | 48                               | 53                            | 39                               | 45                            | 83                               | 83                            | 90                                   | 97                            | 61                                   | 67                            |
| 36 (10)                    | 42                               | 44                            | 33                               | 36                            | 76                               | 76                            | 78                                   | 81                            | 55                                   | 58                            |
| 37 (10)                    | 40                               | 44                            | 32                               | 36                            | 75                               | 75                            | 76                                   | 80                            | 54                                   | 58                            |
| 38 (10)                    | 41                               | 44                            | 32                               | 36                            | 75                               | 76                            | 75                                   | 80                            | 54                                   | 58                            |
| 39 (10)                    | 41                               | 44                            | 32                               | 36                            | 75                               | 76                            | 76                                   | 79                            | 54                                   | 58                            |
| 40 (10)                    | 41                               | 44                            | 33                               | 37                            | 75                               | 76                            | 75                                   | 79                            | 54                                   | 58                            |

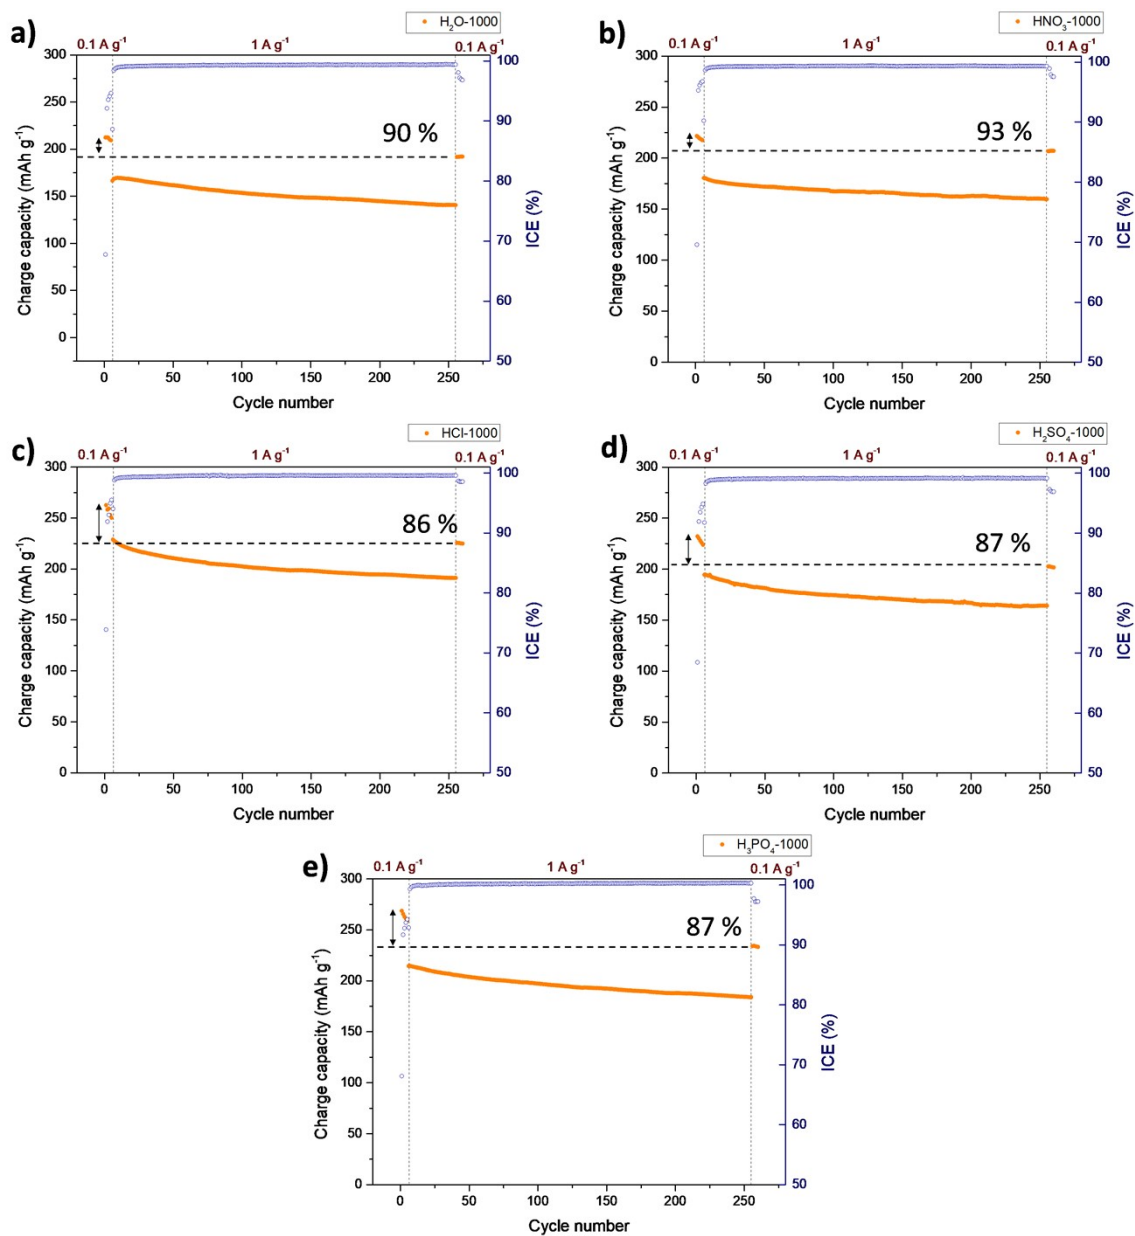

Fig. S34. Cycling performance in terms of charge capacity vs. number of cycles of a) H<sub>2</sub>O-1000, b) HNO<sub>3</sub>-1000, c) HCl-1000, d) H<sub>2</sub>SO<sub>4</sub>-1000, and e) H<sub>3</sub>PO<sub>4</sub>-1000 for 250 cycles at 1 A g<sup>-1</sup> in NaPF<sub>6</sub>/DGM electrolyte.
